# Supplementary material for: Synthesis and characterization of a new family of energetic salts based on guanidinium cation containing furoxanyl functionality
Source: Royal Society of Chemistry journal article supplement (doi:10.1039/c4ra11732h), 2014-01-01
Supplement: c4ra11732h1.pdf [file c4ra11732h1.pdf]

## Supporting Information (SI)

### Synthesis and characterization of a new family of energetic salts based on guanidinium cation containing furoxanyl functionality

Bo Wu,<sup>a</sup> Zhixin Wang,<sup>a</sup> Hongwei Yang,<sup>\*a</sup> Qiuhan Lin,<sup>a,b</sup> Xuehai Ju,<sup>a</sup> Chunxu, Lu<sup>a</sup>  
and Guangbin Cheng<sup>\*a</sup>

a: School of Chemical Engineering, Nanjing University of Science and Technology  
Nanjing 210094, P. R. China

b: School of Materials Science & Engineering, Beijing Institute of Technology  
Beijing 100081, P. R. China.

Email: [hyang@mail.njust.edu.cn](mailto:hyang@mail.njust.edu.cn)  
[gcheng@mail.njust.edu.cn](mailto:gcheng@mail.njust.edu.cn)

### Table of Contents

1. Computation details.
2. Table S2-S10 Crystal data and structure refinement details of 1, 4, 5 and 6.  
Their selected bond lengths [Å], angles [°] and hydrogen bonds details.
3. Figure S1-S4 Crystal structures of salts 1 and 5.
4. Figure S5-S24 <sup>1</sup>H and <sup>13</sup>C NMR spectra of compounds 1-10
3. Figure S25-S32 DSC curves of compounds 3-10

## 1. Computational Details

### Method of calculated densities

One of the most important physical properties of an energetic material is its density. The theoretical detonation parameters were calculated with the density from theoretical calculation. For an ionic crystal with formula unit  $M_pX_q$ , their volumes are simply the sum of the volumes of the ions contained in the formula unit:<sup>[1]</sup>

$$V = pV_{M^+} + qV_{X^-} \quad (1)$$

where M denotes the cation and X denotes the anion. Because the volumes of individual ions are able to be evaluated using the DFT procedure, equation (1) was used to calculate formula unit volumes for ionic crystal. For those salts that contain hydrogen atoms, a “correct” molecular volume using a molecular structure optimized at the DFT level can be calculated using:

$$V_{(\text{corrected})\text{Opt}} = V_{(\text{uncorrected})\text{Opt}} - [0.6763 + 0.9418 \times (\text{no. of hydrogen atoms in the ion})] \quad (2)$$

$$\rho \text{ (g} \cdot \text{cm}^{-3}\text{)} = M_m / V_{(\text{corrected})\text{Opt}} \quad (3)$$

### Heat of formation

Calculations were performed by using the Gaussian 09 suite of programs. The geometric optimization of all the structures and frequency analyses for calculation of heats of formation was carried out by using B3-LYP functional<sup>[1]</sup> with 6-311+G\*\* basis set,<sup>[2]</sup> All of the optimized structures were characterized to be local energy minima on the potential surface without any imaginary frequencies. The heats of formation (HOF) of the furoxanyl functionalized guanidinium cation (FAG cation) and anions were computed through appropriate isodesmic reactions (Scheme S1). The isodesmic reaction processes, i.e., the number of each kind of formal bond is conserved, are used with application of the bond separation reaction (BSR) rules. The molecule is broken down into a set of two heavy-atom molecules containing the same component bonds. The isodesmic reactions used to derive the HOF of the title compounds are in Scheme S1. The change of enthalpy for the reactions at 298 K can be expressed as

$$\Delta H_{298} = \sum \Delta_f H_p - \sum \Delta_f H_R \quad (1)$$

where  $\Delta_f H_R$  and  $\Delta_f H_p$  are the HOF of reactants and products at 298 K, respectively, and  $\Delta H_{298}$  can be calculated using the following expression:

$$\Delta H_{298} = \Delta E_{298} + \Delta(PV) = \Delta E_0 + \Delta ZPE + \Delta H_T + \Delta nRT \quad (2)$$

where  $\Delta E_0$  is the change in total energy between the products and the reactants at 0 K;  $\Delta ZPE$  is the difference between the zero-point energies (*ZPE*) of the products and the reactants at 0 K;  $\Delta H_T$  is thermal correction from 0 to 298 K. The  $\Delta(PV)$  value in eq (2) is the *PV* work term. It equals  $\Delta nRT$  for the reactions of ideal gas. For the isodesmic reactions,  $\Delta n = 0$ , so  $\Delta(PV) = 0$ . On the left side of Eq. (1), apart from target compound, all the others are called reference compounds. The HOF of reference compounds are available either from the experiments<sup>[3-5]</sup> or from the high level computing like CBS-4M.

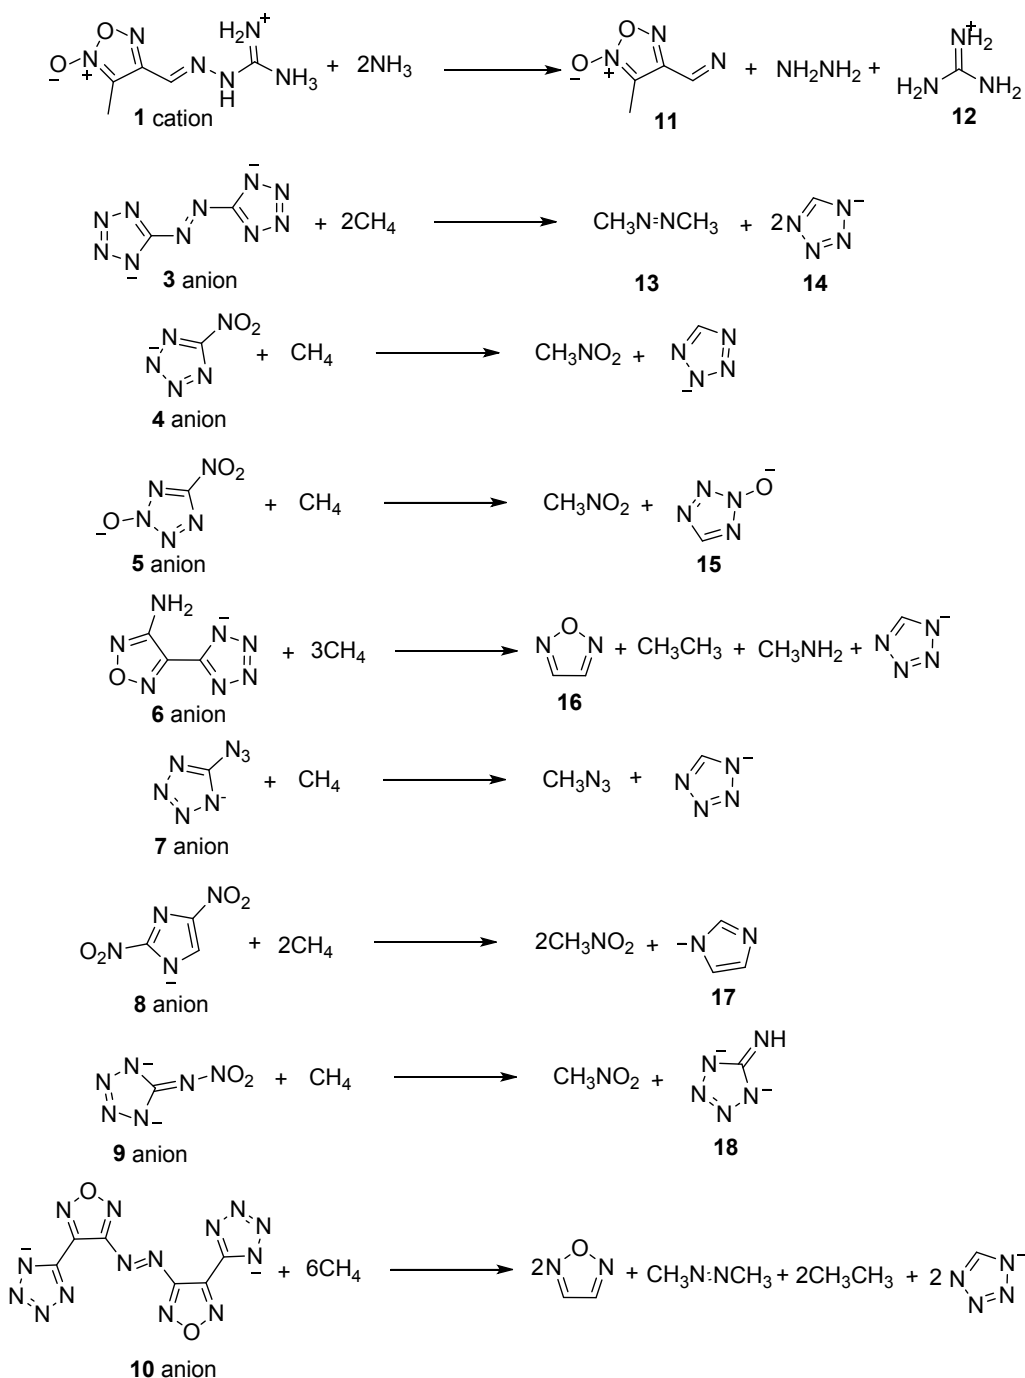

Scheme S1. Isodesmic reactions for the furoxanyl functionalized guanidinium cation (FAG cation) and anions.

Based on Born-Haber energy cycles, the heat of formation of a salt can be simplified and expressed as Equation (3), in which  $\Delta H_L$  is the lattice energy of the salt. This quantity could be predicted by the formula suggested by Jenkins et al (Equation (4)), in which  $n_M$  and  $n_X$  depend on the nature of the ions  $M_p^+$  and  $X_q^-$ , respectively, and are equal to 3 for monatomic ions, 5 for linear polyatomic ions, and 6 for nonlinear polyatomic ions. The equation for the lattice potential energy,  $U_{\text{POT}}$ , takes the form of equation (5), where  $\rho_m$  ( $\text{g cm}^{-3}$ ) is the density,  $M_m$  (g) is the chemical formula mass of the ionic material and the coefficients  $\gamma$  ( $\text{kJ mol}^{-1} \text{cm}$ ) and  $\delta$  ( $\text{kJ mol}^{-1}$ ) are assigned literature values.<sup>[6]</sup>

$$\Delta H_f^\circ(\text{salt}, 298 \text{ K}) = \Delta H_f^\circ(\text{cation}, 298 \text{ K}) + \Delta H_f^\circ(\text{anion}, 298 \text{ K}) - \Delta H_L \quad (3)$$

$$\Delta H_L = U_{\text{POT}} + [p(n_M/2 - 2) + q(n_X/2 - 2)]RT \quad (4)$$

$$U_{\text{POT}} (\text{kJ} \cdot \text{mol}^{-1}) = \gamma (\rho_m/M_m)^{1/3} + \delta \quad (5)$$

Table S1 Total energy and heat of formation for the title compounds at B3LYP/6-311+G\*\* level<sup>a</sup>

|                                  | $E_0/\text{a.u.}$ | ZPE/ $\text{kJ}\cdot\text{mol}^{-1}$ | $\Delta H_T/\text{kJ mol}^{-1}$ | HOF/ $\text{kJ mol}^{-1}$ |
|----------------------------------|-------------------|--------------------------------------|---------------------------------|---------------------------|
| CH <sub>4</sub>                  | -40.5339263       | 112.26                               | 10.04                           | -74.60 <sup>b</sup>       |
| NH <sub>3</sub>                  | -56.5826356       | 86.27                                | 10.05                           | -45.90 <sup>b</sup>       |
| H <sub>2</sub> N-NH <sub>2</sub> | -111.9105763      | 134.28                               | 11.16                           | 95.40 <sup>b</sup>        |
| CH <sub>3</sub> NO <sub>2</sub>  | -245.0915559      | 124.93                               | 11.60                           | -80.80 <sup>b</sup>       |
| CH <sub>3</sub> CH <sub>3</sub>  | -79.8565413       | 187.31                               | 11.79                           | -84.00 <sup>b</sup>       |
| CH <sub>3</sub> NH <sub>2</sub>  | -95.8938402       | 160.78                               | 11.64                           | -22.50 <sup>b</sup>       |
| CH <sub>3</sub> N <sub>3</sub>   | -204.153351       | 126.22                               | 14.41                           | 302.30 <sup>c</sup>       |
| <b>1</b> cation                  | -674.7098601      | 418.16                               | 38.90                           | 961.93                    |
| <b>3</b> anion                   | -623.787668       | 144.11                               | 25.27                           | 788.47                    |
| <b>4</b> anion                   | -462.3675686      | 90.67                                | 17.74                           | 112.01                    |
| <b>5</b> anion                   | -537.5669458      | 101.24                               | 19.85                           | 57.84                     |
| <b>6</b> anion                   | -574.1182105      | 191.70                               | 22.33                           | 331.55                    |
| <b>7</b> anion                   | -421.4323947      | 93.13                                | 18.05                           | 485.83                    |
| <b>8</b> anion                   | -634.8962488      | 157.74                               | 25.06                           | -129.87                   |
| <b>9</b> anion                   | -517.0464687      | 100.91                               | 19.95                           | 402.04                    |
| <b>10</b> anion                  | -1145.654207      | 273.34                               | 45.46                           | 1200.14                   |
| <b>11</b>                        | -470.112577       | 248.22                               | 25.28                           | 257.97 <sup>c</sup>       |
| <b>12</b>                        | -205.8352863      | 220.21                               | 15.56                           | 565.59 <sup>d</sup>       |
| <b>13</b>                        | -189.3337358      | 211.85                               | 16.32                           | 147.85 <sup>c</sup>       |
| <b>14</b>                        | -257.7887821      | 84.91                                | 11.26                           | 175.75 <sup>d</sup>       |
| <b>15</b>                        | -332.9899087      | 96.05                                | 13.15                           | 117.33 <sup>d</sup>       |
| <b>16</b>                        | -262.1183629      | 114.62                               | 11.84                           | 215.72 <sup>c</sup>       |
| <b>17</b>                        | -225.7140337      | 144.06                               | 12.04                           | 60.08 <sup>d</sup>        |
| <b>18</b>                        | -312.4067394      | 93.18                                | 13.81                           | 617.14 <sup>d</sup>       |

<sup>a</sup>  $E_0$  in a.u. ZPE (vibrational zero-point energy),  $\Delta H_T$  (thermal correction to enthalpy) and HOF are in  $\text{kJ mol}^{-1}$ . <sup>b</sup> Data are from Ref. [D. R. Lide, ed., CRC Handbook of Chemistry and Physics, 88th Edition (Internet Version 2008), CRC Press/Taylor and Francis, Boca Raton, FL.]. <sup>c</sup> Data obtained from CBS-4M calculation in combination with the atomization reaction of the corresponding compound. <sup>d</sup> Data from Ref.[4].

## References

- 1 (a) A. D. Becke, *J. Phys. Chem.*, 1993, **98**, 5648; (b) P. J. Stephens, F. J. Devlin, C. F. Chabalowski and M. J. Frisch, *J. Phys. Chem.*, 1994, **98**, 11623.
- 2 P. C. Hariharan and J. A. Pople, *Theoretica Chimica Acta*, 1973, **28**, 213.
- 3 D. R. Lide, CRC Handbook of Chemistry and Physics, 88th Edition (Internet Version 2008), CRC Press/Taylor and Francis, Boca Raton, FL, 2007-2008.
- 4 N. Fischer, T. M. Klapötke and J. Stierstorfer, *Z. Anorg. Allg. Chem.*, 2009, **635**, 271.
- 5 Y. -H. Joo, J. H. Chung, S. G. Cho and E. M. Goh, *New J. Chem.*, 2013, **37**, 1180.
- 6 H. D. B. Jenkins, D. Tudela and L. Glasser. *Inorg. Chem.*, 2002, 41, 2364.

**2. Crystal data and structure refinement details of 1, 4, 5 and 6. Their selected bond lengths [Å], angles [°] and hydrogen bonds details.**

Table S2. Crystal data and structure refinement details of 1, 4, 5 and 6.

| Crystal                       | 1                                                             | 4                                                             | 5                                                            | 6                                                             |
|-------------------------------|---------------------------------------------------------------|---------------------------------------------------------------|--------------------------------------------------------------|---------------------------------------------------------------|
| formula                       | C <sub>5</sub> H <sub>9</sub> ClN <sub>6</sub> O <sub>2</sub> | C <sub>6</sub> H <sub>10</sub> N <sub>11</sub> O <sub>4</sub> | C <sub>6</sub> H <sub>9</sub> N <sub>11</sub> O <sub>5</sub> | C <sub>8</sub> H <sub>13</sub> N <sub>13</sub> O <sub>4</sub> |
| <i>T</i> /K                   | 173(2)                                                        | 173(2)                                                        | 173(2)                                                       | 173(2)                                                        |
| <i>λ</i> /Å                   | 0.71073                                                       | 0.71073                                                       | 0.71073                                                      | 0.71073                                                       |
| crystal system                | monoclinic                                                    | monoclinic                                                    | monoclinic                                                   | monoclinic                                                    |
| space group                   | P2 <sub>1</sub>                                               | P2 <sub>1</sub> /c                                            | P2 <sub>1</sub> /n                                           | P2 <sub>1</sub> /c                                            |
| <i>a</i> /Å                   | 5.8923(5)                                                     | 10.9990(8)                                                    | 11.3383(10)                                                  | 9.3457(6)                                                     |
| <i>b</i> /Å                   | 11.4413(9)                                                    | 6.3838(4)                                                     | 6.2879(5)                                                    | 25.7804(17)                                                   |
| <i>c</i> /Å                   | 7.6951(7)                                                     | 18.1184(10)                                                   | 18.1702(12)                                                  | 13.4303(9)                                                    |
| <i>α</i> /°                   | 90                                                            | 90                                                            | 90                                                           | 90                                                            |
| <i>β</i> /°                   | 112.239(3)                                                    | 104.323(2)                                                    | 104.761(3)                                                   | 109.4145(19)                                                  |
| <i>γ</i> /°                   | 90                                                            | 90                                                            | 90                                                           | 90                                                            |
| <i>V</i> /Å <sup>3</sup>      | 480.18(7)                                                     | 1232.65(14)                                                   | 1252.67(17)                                                  | 3051.8(3)                                                     |
| <i>Z</i>                      | 2                                                             | 4                                                             | 4                                                            | 8                                                             |
| <i>ρ</i> /g cm <sup>-3</sup>  | 1.526                                                         | 1.612                                                         | 1.672                                                        | 1.547                                                         |
| F(000)                        | 228                                                           | 616                                                           | 648                                                          | 1472                                                          |
| □ range for data collection/° | 3.37 to 25.03                                                 | 3.35 to 26.02                                                 | 3.44 to 25.37                                                | 3.22 to 25.98                                                 |
| Limiting                      | -7<= <i>h</i> <=7, -                                          | -                                                             | -13<= <i>h</i> <=13, -                                       | -                                                             |

|                              |                                                         |                                                            |                                                      |                                                            |
|------------------------------|---------------------------------------------------------|------------------------------------------------------------|------------------------------------------------------|------------------------------------------------------------|
| indices                      | 13<=k<=13,<br>-9<=l<=9                                  | 13<=h<=13,<br>-                                            | -7<=k<=7, -<br>21<=l<=21                             | 11<=h<=11<br>, -<br>31<=k<=31<br>, -<br>16<=l<=16          |
| GOF on $F^2$                 | 1.006                                                   | 1.017                                                      | 1.033                                                | 1.021                                                      |
| Final R indices<br>[I>2σ(I)] | R <sub>1</sub> = 0.0507,<br>wR <sub>2</sub> =<br>0.1002 | R <sub>1</sub> =<br>0.0356,<br>wR <sub>2</sub> =<br>0.0864 | R <sub>1</sub> = 0.0412,<br>wR <sub>2</sub> = 0.0877 | R <sub>1</sub> =<br>0.0461,<br>wR <sub>2</sub> =<br>0.0879 |
| R indices<br>(all data)      | R <sub>1</sub> = 0.0785,<br>wR <sub>2</sub> =<br>0.1137 | R <sub>1</sub> =<br>0.0540,<br>wR <sub>2</sub> =<br>0.0948 | R <sub>1</sub> = 0.0796,<br>wR <sub>2</sub> = 0.1008 | R <sub>1</sub> =<br>0.1013,<br>wR <sub>2</sub> =<br>0.0981 |
| CCDC                         | 996724                                                  | 101796<br>8                                                | 1017969                                              | 1017970                                                    |

Table S3. Selected bond lengths [Å] and angles [°] of salt **1**

| Parameter | Å        | Parameter      | °        |
|-----------|----------|----------------|----------|
| C(1)-N(1) | 1.312(6) | N(1)-C(1)-C(2) | 106.3(4) |
| C(1)-C(2) | 1.413(7) | N(1)-C(1)-C(3) | 120.2(4) |
| C(1)-C(3) | 1.478(7) | C(2)-C(1)-C(3) | 133.5(4) |
| C(2)-N(2) | 1.317(6) | N(2)-C(2)-C(1) | 112.0(4) |
| C(2)-C(4) | 1.445(6) | N(2)-C(2)-C(4) | 119.0(4) |
| C(4)-N(3) | 1.277(6) | C(1)-C(2)-C(4) | 129.0(4) |
| C(5)-N(6) | 1.317(6) | N(3)-C(4)-C(2) | 119.4(4) |
| C(5)-N(5) | 1.322(6) | N(6)-C(5)-N(5) | 121.2(4) |
| C(5)-N(4) | 1.337(6) | N(6)-C(5)-N(4) | 118.4(4) |
| N(1)-O(2) | 1.237(5) | N(5)-C(5)-N(4) | 120.3(4) |
| N(1)-O(1) | 1.464(5) | O(2)-N(1)-C(1) | 136.0(5) |
| N(2)-O(1) | 1.368(5) | O(2)-N(1)-O(1) | 115.9(4) |
| N(3)-N(4) | 1.367(5) | C(1)-N(1)-O(1) | 107.9(4) |
|           |          | C(2)-N(2)-O(1) | 107.0(4) |
|           |          | C(4)-N(3)-N(4) | 115.9(4) |
|           |          | C(5)-N(4)-N(3) | 119.2(4) |
|           |          | N(2)-O(1)-N(1) | 106.8(3) |

Table S4. Hydrogen bonds present in salt **1**.

| D—H...A | d(D-H)/ Å | d(H...A)/ Å | d(D...A)/ Å | <(DHA)/ ° | comment |
|---------|-----------|-------------|-------------|-----------|---------|
|---------|-----------|-------------|-------------|-----------|---------|

|                                   |      |      |          |     |       |
|-----------------------------------|------|------|----------|-----|-------|
| N(4)—H(4A) ⋯ Cl(1) <sup>i</sup>   | 0.88 | 2.20 | 3.048(4) | 163 | inter |
| N(5)—H(5A) ⋯ Cl(1) <sup>i</sup>   | 0.88 | 2.40 | 3.196(4) | 151 | inter |
| N(5)—H(5B) ⋯ Cl(1) <sup>ii</sup>  | 0.88 | 2.76 | 3.346(4) | 125 | inter |
| N(5)—H(5B) ⋯ N(3)                 | 0.88 | 2.36 | 2.676(5) | 102 | intra |
| N(5)—H(5B) ⋯ O(1) <sup>iii</sup>  | 0.88 | 2.60 | 3.007(5) | 110 | inter |
| N(6)—H(6A) ⋯ Cl(1) <sup>iii</sup> | 0.88 | 2.54 | 3.303(4) | 145 | inter |
| N(6)—H(6B) ⋯ O(2) <sup>iv</sup>   | 0.88 | 2.29 | 2.919(6) | 129 | inter |
| N(6)—H(6B) ⋯ Cl(1) <sup>i</sup>   | 0.88 | 2.77 | 3.495(4) | 141 | inter |
| C(3)—H(3A) ⋯ O(2)                 | 0.98 | 2.59 | 2.977(8) | 104 | intra |
| C(3)—H(3A) ⋯ Cl(1) <sup>ii</sup>  | 0.98 | 2.70 | 3.669(5) | 172 | inter |

i: 1-x,1/2+y,-z; ii: -1+x,y,z; iii: -x,-1/2+y,1-z; iv: 1+x,y,-1+z

Table S5. Selected bond lengths [Å] and angles [°] of salt **4**

| Parameter  | Å          | Parameter        | °          |
|------------|------------|------------------|------------|
| C(1)-N(4)  | 1.320(2)   | N(4)-C(1)-N(1)   | 114.24(14) |
| C(1)-N(1)  | 1.322(2)   | N(4)-C(1)-N(5)   | 122.71(15) |
| C(1)-N(5)  | 1.445(2)   | N(1)-C(1)-N(5)   | 123.05(13) |
| C(2)-N(6)  | 1.315(2)   | N(6)-C(2)-C(3)   | 106.07(15) |
| C(2)-C(3)  | 1.415(2)   | N(6)-C(2)-C(4)   | 121.35(16) |
| C(2)-C(4)  | 1.479(3)   | C(3)-C(2)-C(4)   | 132.43(17) |
| C(3)-N(7)  | 1.312(2)   | N(7)-C(3)-C(2)   | 112.04(15) |
| C(3)-C(5)  | 1.456(2)   | N(7)-C(3)-C(5)   | 118.59(15) |
| C(5)-N(8)  | 1.277(2)   | C(2)-C(3)-C(5)   | 129.35(15) |
| C(6)-N(11) | 1.315(2)   | N(8)-C(5)-C(3)   | 119.00(15) |
| C(6)-N(10) | 1.321(2)   | N(11)-C(6)-N(10) | 122.98(15) |
| C(6)-N(9)  | 1.348(2)   | N(11)-C(6)-N(9)  | 119.57(15) |
| N(1)-N(2)  | 1.3423(19) | N(10)-C(6)-N(9)  | 117.44(14) |
| N(2)-N(3)  | 1.3186(19) | C(1)-N(1)-N(2)   | 103.41(13) |
| N(3)-N(4)  | 1.343(2)   | N(3)-N(2)-N(1)   | 109.35(14) |
| N(5)-O(2)  | 1.2225(19) | N(2)-N(3)-N(4)   | 109.83(13) |
| N(5)-O(1)  | 1.2232(18) | C(1)-N(4)-N(3)   | 103.17(13) |
| N(6)-O(4)  | 1.2372(19) | O(2)-N(5)-O(1)   | 124.45(15) |
| N(6)-O(3)  | 1.4583(19) | O(2)-N(5)-C(1)   | 117.89(13) |
| N(7)-O(3)  | 1.3677(18) | O(1)-N(5)-C(1)   | 117.64(14) |
| N(8)-N(9)  | 1.3731(18) | O(4)-N(6)-C(2)   | 135.08(16) |
|            |            | O(4)-N(6)-O(3)   | 117.11(14) |
|            |            | C(2)-N(6)-O(3)   | 107.82(13) |
|            |            | C(3)-N(7)-O(3)   | 106.98(13) |

|                |            |
|----------------|------------|
| C(5)-N(8)-N(9) | 114.98(14) |
| C(6)-N(9)-N(8) | 118.71(13) |
| N(7)-O(3)-N(6) | 107.04(11) |

Table S6. Hydrogen bonds present in salt **4**.

| D—H...A                              | d(D-H)/ Å | d(H...A)/ Å | d(D...A)/ Å | <(DHA)/ ° | comment |
|--------------------------------------|-----------|-------------|-------------|-----------|---------|
| N(9)—H(9) ... N(4) <sup>i</sup>      | 0.88      | 1.96        | 2.8290(19)  | 170       | inter   |
| N(10)—H(10A) ... N(2) <sup>ii</sup>  | 0.88      | 2.23        | 2.988(2)    | 145       | inter   |
| N(10)—H(10A) ... O(1) <sup>iii</sup> | 0.88      | 2.52        | 3.1199(19)  | 126       | inter   |
| N(10)—H(10B) ... N(3) <sup>i</sup>   | 0.88      | 2.21        | 3.060(2)    | 164       | inter   |
| N(11)—H(11A) ... N(1) <sup>iii</sup> | 0.88      | 2.09        | 2.959(2)    | 172       | inter   |
| N(11)—H(11B) ... N(8)                | 0.88      | 2.32        | 2.657(2)    | 103       | intra   |
| C(4)—H(4C) ... O(1) <sup>iii</sup>   | 0.98      | 2.43        | 3.360(3)    | 159       | inter   |
| C(5)—H(5) ... O(2) <sup>i</sup>      | 0.95      | 2.51        | 3.448(2)    | 170       | inter   |

i: 1-x,1-y,-z; ii: x,-1+y,z; iii: 1-x,-1/2+y,1/2-z

Table S7. Selected bond lengths [Å] and angles [°] of salt **5**

| Parameter  | Å        | Parameter        | °          |
|------------|----------|------------------|------------|
| C(1)-N(4)  | 1.314(3) | N(4)-C(1)-N(1)   | 115.61(19) |
| C(1)-N(1)  | 1.329(3) | N(4)-C(1)-N(5)   | 121.63(19) |
| C(1)-N(5)  | 1.438(3) | N(1)-C(1)-N(5)   | 122.72(18) |
| C(2)-N(6)  | 1.322(3) | N(6)-C(2)-C(3)   | 106.08(19) |
| C(2)-C(3)  | 1.414(3) | N(6)-C(2)-C(4)   | 120.8(2)   |
| C(2)-C(4)  | 1.479(3) | C(3)-C(2)-C(4)   | 133.1(2)   |
| C(3)-N(7)  | 1.309(3) | N(7)-C(3)-C(2)   | 112.11(19) |
| C(3)-C(5)  | 1.455(3) | N(7)-C(3)-C(5)   | 118.82(19) |
| C(5)-N(8)  | 1.275(3) | C(2)-C(3)-C(5)   | 129.0(2)   |
| C(6)-N(11) | 1.313(3) | N(8)-C(5)-C(3)   | 118.8(2)   |
| C(6)-N(10) | 1.319(3) | N(11)-C(6)-N(10) | 122.5(2)   |
| C(6)-N(9)  | 1.345(3) | N(11)-C(6)-N(9)  | 119.53(19) |
| N(1)-N(2)  | 1.334(2) | N(10)-C(6)-N(9)  | 118.0(2)   |
| N(2)-O(1)  | 1.269(2) | C(1)-N(1)-N(2)   | 99.40(16)  |
| N(2)-N(3)  | 1.329(2) | O(1)-N(2)-N(3)   | 122.23(18) |
| N(3)-N(4)  | 1.335(3) | O(1)-N(2)-N(1)   | 123.28(18) |
| N(5)-O(3)  | 1.219(2) | N(3)-N(2)-N(1)   | 114.48(18) |
| N(5)-O(2)  | 1.229(2) | N(2)-N(3)-N(4)   | 105.35(17) |
| N(6)-O(5)  | 1.233(2) | C(1)-N(4)-N(3)   | 105.16(18) |
| N(6)-O(4)  | 1.456(2) | O(3)-N(5)-O(2)   | 124.8(2)   |
| N(7)-O(4)  | 1.370(2) | O(3)-N(5)-C(1)   | 118.03(18) |



|           |          |                |            |
|-----------|----------|----------------|------------|
| N(8)-N(9) | 1.367(2) | O(2)-N(5)-C(1) | 117.17(19) |
|           |          | O(5)-N(6)-C(2) | 135.0(2)   |
|           |          | O(5)-N(6)-O(4) | 117.41(17) |
|           |          | C(2)-N(6)-O(4) | 107.56(17) |
|           |          | C(3)-N(7)-O(4) | 107.00(17) |
|           |          | C(5)-N(8)-N(9) | 116.19(17) |
|           |          | C(6)-N(9)-N(8) | 118.33(17) |
|           |          | N(7)-O(4)-N(6) | 107.17(14) |

Table S8. Hydrogen bonds present in salt **5**.

| D—H...A                              | d(D-H)/<br>Å | d(H...A)/ Å | d(D...A)/ Å | <(DHA)/ ° | comment |
|--------------------------------------|--------------|-------------|-------------|-----------|---------|
| N(9)—H(9) ••• N(1) <sup>i</sup>      | 0.88         | 2.20        | 3.080(3)    | 174       | inter   |
| N(10)—H(10A) ••• O(2) <sup>ii</sup>  | 0.88         | 2.54        | 3.206(3)    | 133       | inter   |
| N(10)—H(10A) ••• O(1) <sup>iii</sup> | 0.88         | 2.43        | 2.930(3)    | 117       | inter   |
| N(10)—H(10B) ••• O(1) <sup>i</sup>   | 0.88         | 1.91        | 2.784(3)    | 172       | inter   |
| N(11)—H(11A) ••• N(4) <sup>ii</sup>  | 0.88         | 2.09        | 2.956(3)    | 169       | inter   |
| N(11)—H(11B) ••• O(2) <sup>ii</sup>  | 0.88         | 2.44        | 3.140(3)    | 137       | inter   |
| N(11)—H(11B) ••• N(8)                | 0.88         | 2.30        | 2.641(3)    | 103       | intra   |
| C(4)—H(4A) ••• O(2) <sup>ii</sup>    | 0.98         | 2.37        | 3.296(3)    | 157       | inter   |
| C(5)—H(5) ••• O(3) <sup>i</sup>      | 0.95         | 2.49        | 3.398(3)    | 159       | inter   |

i: -1/2-x, -3/2+y, 1/2-z; ii: 1/2+x, 1/2-y, 1/2+z; iii: x, -1+y, z; iv: x, -1+y,z; v: 1/2+x, 1/2-y, 1/2+z

Table S9. Selected bond lengths [Å] and angles [°] of salt **6**

| Parameter  | Å        | Parameter       | °          |
|------------|----------|-----------------|------------|
| C(1)-N(1)  | 1.309(3) | N(1)-C(1)-N(3)  | 123.9(2)   |
| C(1)-N(3)  | 1.350(3) | N(1)-C(1)-C(2)  | 108.63(19) |
| C(1)-C(2)  | 1.440(3) | N(3)-C(1)-C(2)  | 127.43(19) |
| C(2)-N(2)  | 1.303(3) | N(2)-C(2)-C(1)  | 108.73(18) |
| C(2)-C(3)  | 1.450(3) | N(2)-C(2)-C(3)  | 122.44(19) |
| C(3)-N(4)  | 1.335(3) | C(1)-C(2)-C(3)  | 128.82(19) |
| C(3)-N(7)  | 1.351(2) | N(4)-C(3)-N(7)  | 112.55(18) |
| C(4)-N(8)  | 1.311(3) | N(4)-C(3)-C(2)  | 122.59(18) |
| C(4)-N(10) | 1.349(3) | N(7)-C(3)-C(2)  | 124.86(19) |
| C(4)-C(5)  | 1.425(3) | N(8)-C(4)-N(10) | 124.8(2)   |
| C(5)-N(9)  | 1.300(3) | N(8)-C(4)-C(5)  | 109.26(19) |
| C(5)-C(6)  | 1.465(3) | N(10)-C(4)-C(5) | 125.9(2)   |
| C(6)-N(14) | 1.335(3) | N(9)-C(5)-C(4)  | 109.51(19) |
| C(6)-N(11) | 1.337(3) | N(9)-C(5)-C(6)  | 123.54(19) |

---

|             |          |                   |            |
|-------------|----------|-------------------|------------|
| C(7)-N(15)  | 1.321(3) | C(4)-C(5)-C(6)    | 126.95(19) |
| C(7)-C(8)   | 1.415(3) | N(14)-C(6)-N(11)  | 112.51(18) |
| C(7)-C(9)   | 1.481(3) | N(14)-C(6)-C(5)   | 125.55(19) |
| C(8)-N(16)  | 1.316(2) | N(11)-C(6)-C(5)   | 121.94(18) |
| C(8)-C(10)  | 1.457(3) | N(15)-C(7)-C(8)   | 105.68(18) |
| C(10)-N(17) | 1.274(3) | N(15)-C(7)-C(9)   | 120.86(19) |
| C(11)-N(21) | 1.323(3) | C(8)-C(7)-C(9)    | 133.42(19) |
| C(11)-C(12) | 1.420(3) | N(16)-C(8)-C(7)   | 112.53(18) |
| C(11)-C(13) | 1.476(3) | N(16)-C(8)-C(10)  | 117.26(19) |
| C(12)-N(22) | 1.318(3) | C(7)-C(8)-C(10)   | 130.20(19) |
| C(12)-C(14) | 1.448(3) | N(17)-C(10)-C(8)  | 121.49(19) |
| C(14)-N(23) | 1.281(3) | N(21)-C(11)-C(12) | 106.3(2)   |
| C(15)-N(26) | 1.309(3) | N(21)-C(11)-C(13) | 120.6(2)   |
| C(15)-N(25) | 1.319(3) | C(12)-C(11)-C(13) | 133.1(2)   |
| C(15)-N(24) | 1.347(3) | N(22)-C(12)-C(11) | 112.2(2)   |
| C(23)-N(20) | 1.312(3) | N(22)-C(12)-C(14) | 118.2(2)   |
| C(23)-N(19) | 1.321(3) | C(11)-C(12)-C(14) | 129.7(2)   |
| C(23)-N(18) | 1.350(3) | N(23)-C(14)-C(12) | 120.4(2)   |
| N(1)-O(1)   | 1.401(2) | N(26)-C(15)-N(25) | 121.6(2)   |
| N(2)-O(1)   | 1.374(2) | N(26)-C(15)-N(24) | 118.6(2)   |
| N(4)-N(5)   | 1.346(2) | N(25)-C(15)-N(24) | 119.8(2)   |
| N(5)-N(6)   | 1.328(2) | N(20)-C(23)-N(19) | 121.54(19) |
| N(6)-N(7)   | 1.345(2) | N(20)-C(23)-N(18) | 118.76(19) |
| N(8)-O(2)   | 1.408(2) | N(19)-C(23)-N(18) | 119.68(19) |
| N(9)-O(2)   | 1.375(2) | C(1)-N(1)-O(1)    | 105.70(16) |
| N(11)-N(12) | 1.348(2) | C(2)-N(2)-O(1)    | 106.70(16) |
| N(12)-N(13) | 1.322(2) | C(3)-N(4)-N(5)    | 104.05(16) |
| N(13)-N(14) | 1.341(2) | N(6)-N(5)-N(4)    | 110.02(16) |
| N(15)-O(4)  | 1.238(2) | N(5)-N(6)-N(7)    | 109.37(16) |
| N(15)-O(3)  | 1.457(2) | N(6)-N(7)-C(3)    | 104.02(17) |
| N(16)-O(3)  | 1.376(2) | C(4)-N(8)-O(2)    | 104.51(17) |
| N(17)-N(18) | 1.377(2) | C(5)-N(9)-O(2)    | 105.83(17) |
| N(21)-O(6)  | 1.234(2) | C(6)-N(11)-N(12)  | 104.11(16) |
| N(21)-O(5)  | 1.466(2) | N(13)-N(12)-N(11) | 109.40(17) |
| N(22)-O(5)  | 1.377(2) | N(12)-N(13)-N(14) | 109.68(16) |
| N(23)-N(24) | 1.376(2) | C(6)-N(14)-N(13)  | 104.30(17) |
|             |          | O(4)-N(15)-C(7)   | 134.55(19) |
|             |          | O(4)-N(15)-O(3)   | 117.23(16) |
|             |          | C(7)-N(15)-O(3)   | 108.21(16) |
|             |          | C(8)-N(16)-O(3)   | 106.64(16) |
|             |          | C(10)-N(17)-N(18) | 114.87(17) |
|             |          | C(23)-N(18)-N(17) | 118.86(17) |
|             |          | O(6)-N(21)-C(11)  | 136.1(2)   |
|             |          | O(6)-N(21)-O(5)   | 116.37(18) |

---

|                   |            |
|-------------------|------------|
| C(11)-N(21)-O(5)  | 107.56(18) |
| C(12)-N(22)-O(5)  | 106.78(19) |
| C(14)-N(23)-N(24) | 115.81(19) |
| C(15)-N(24)-N(23) | 118.35(18) |
| N(2)-O(1)-N(1)    | 110.22(14) |
| N(9)-O(2)-N(8)    | 110.90(15) |
| N(16)-O(3)-N(15)  | 106.93(13) |
| N(22)-O(5)-N(21)  | 107.17(15) |

Table S10. Hydrogen bonds present in salt **6**.

| D—H...A                            | d(D-H)/ Å | d(H...A)/ Å | d(D...A)/ Å | <(DHA)/ ° | comment |
|------------------------------------|-----------|-------------|-------------|-----------|---------|
| N(3)—H(3A)...N(8) <sup>i</sup>     | 0.88      | 2.40        | 3.217(3)    | 155       | inter   |
| N(3)—H(3B)...N(4)                  | 0.88      | 2.46        | 3.047(3)    | 125       | intra   |
| O(7)—H(7A)...N(14) <sup>ii</sup>   | 0.840(16) | 1.994(17)   | 2.823(2)    | 169(3)    | inter   |
| O(7)—H(7B)...O(4) <sup>i</sup>     | 0.83(2)   | 2.18(2)     | 2.914(3)    | 148(2)    | inter   |
| O(8)—H(8A)...N(13) <sup>iii</sup>  | 0.83(2)   | 2.10(2)     | 2.896(3)    | 160.2(19) | inter   |
| O(8)—H(8B)...O(7) <sup>iii</sup>   | 0.823(17) | 2.033(17)   | 2.852(3)    | 174(2)    | inter   |
| N(10)—H(10A)...N(1) <sup>i</sup>   | 0.88      | 2.08        | 2.919(3)    | 159       | inter   |
| N(10)—H(10B)...N(11)               | 0.88      | 2.33        | 2.940(3)    | 127       | intra   |
| N(18)—H(18)...N(12) <sup>i</sup>   | 0.88      | 2.08        | 2.946(2)    | 167       | inter   |
| N(19)—H(19A)...N(6) <sup>iv</sup>  | 0.88      | 2.20        | 3.056(3)    | 165       | inter   |
| N(19)—H(19B)...N(17)               | 0.88      | 2.33        | 2.669(2)    | 103       | intra   |
| N(20)—H(20A)...N(5) <sup>iv</sup>  | 0.88      | 2.01        | 2.875(3)    | 166       | inter   |
| N(20)—H(20B)...O(8) <sup>v</sup>   | 0.88      | 2.01        | 2.845(3)    | 158       | inter   |
| N(24)—H(24)...N(7) <sup>v</sup>    | 0.88      | 2.07        | 2.949(3)    | 174       | inter   |
| N(25)—H(25A)...N(13) <sup>vi</sup> | 0.88      | 2.38        | 3.126(3)    | 143       | inter   |
| N(25)—H(25B)...N(23)               | 0.88      | 2.32        | 2.657(3)    | 103       | intra   |
| N(25)—H(25B)...O(8) <sup>vii</sup> | 0.88      | 2.37        | 3.000(3)    | 129       | inter   |
| N(26)—H(26A)...O(7) <sup>i</sup>   | 0.88      | 1.94        | 2.821(3)    | 173       | inter   |
| N(26)—H(26B)...N(2) <sup>i</sup>   | 0.88      | 2.07        | 2.924(3)    | 164       | inter   |
| C(10)—H(10)...N(11) <sup>i</sup>   | 0.95      | 2.31        | 3.255(3)    | 175       | inter   |

|                                |      |      |          |     |       |
|--------------------------------|------|------|----------|-----|-------|
| C(10)—H(10)⋯N(12) <sup>i</sup> | 0.95 | 2.59 | 3.405(3) | 144 | inter |
|--------------------------------|------|------|----------|-----|-------|

i: 1-x, 1-y, 1-z; ii: 1-x, -1/2+y, 1/2-z; iii: 1-x, 1-y, -z; iv: -1+x, y, 1+z; v: x, y, 1+z; vi: x, 3/2-y, 1/2+z; vii: 1-x, 1/2+y, 1/2-z

### 3. Figure S1-S4 Crystal structure of salts 1 and 5.

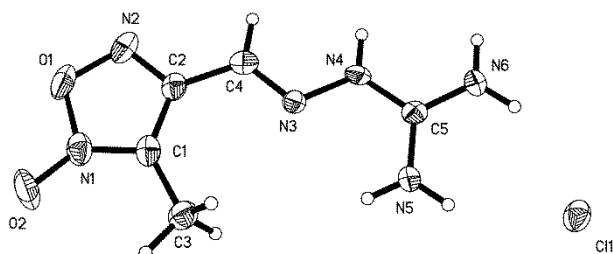

**Figure S1.** Molecular structure of **1**. Thermal ellipsoids are set to 50% probability. Hydrogen atoms are included but are unlabelled for clarity.

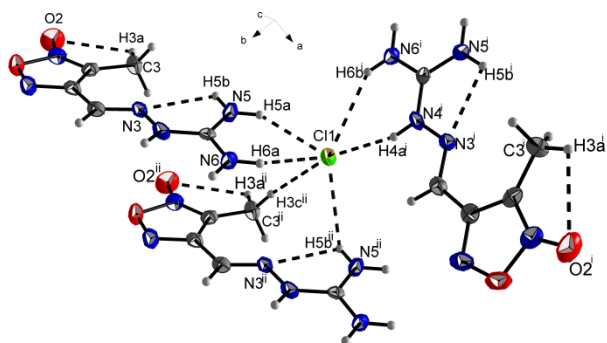

**Figure S2.** View of the hydrogen bonds of one chloride anion in the structure of **1**. Thermal ellipsoids represent the 50% probability level. Symmetry operators: (i) 1-x, -0.5+y, -z; (ii) 1+x, y, z.

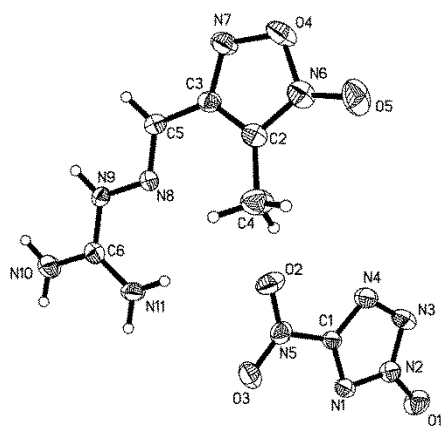

**Figure S3.** Molecular structure of **5**. Thermal ellipsoids are set to 50% probability. Hydrogen atoms are included but are unlabelled for clarity.

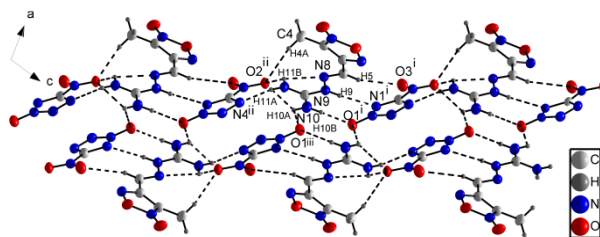

Figure S4. View along the *b* axes in the structure of **5**.

#### 4. $^1\text{H}$ and $^{13}\text{C}$ NMR spectra of compounds 1-10

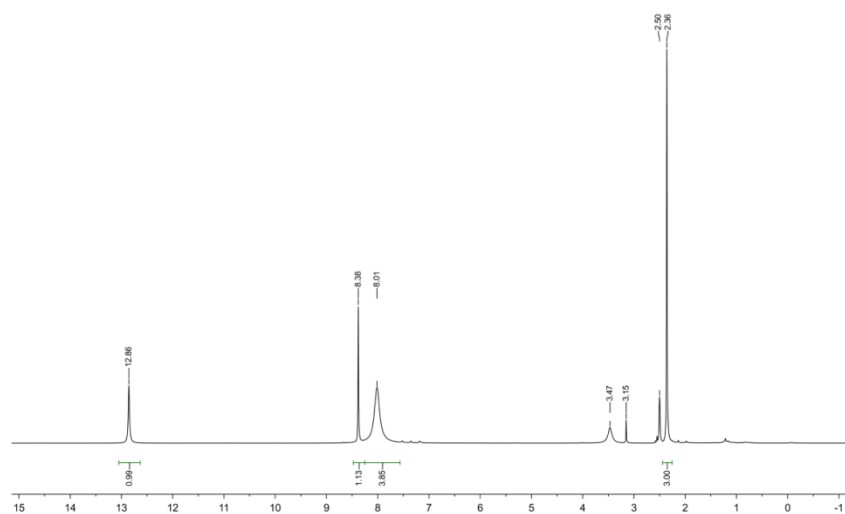

Figure S5  $^1\text{H}$  NMR spectra (300 MHz) of **1** in  $[\text{D}_6]\text{DMSO}$  at 25 °C

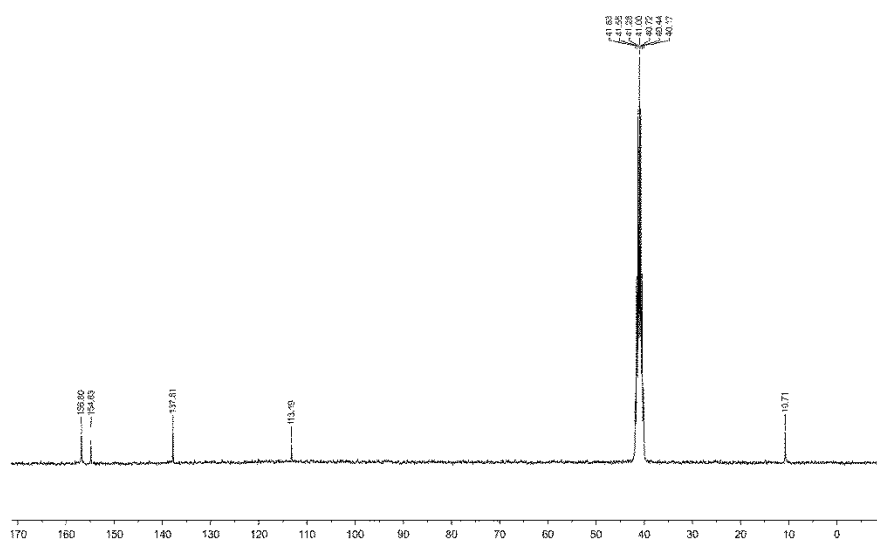

Figure S6  $^{13}\text{C}$  NMR spectra (75 MHz) of **1** in  $[\text{D}_6]\text{DMSO}$  at 25 °C

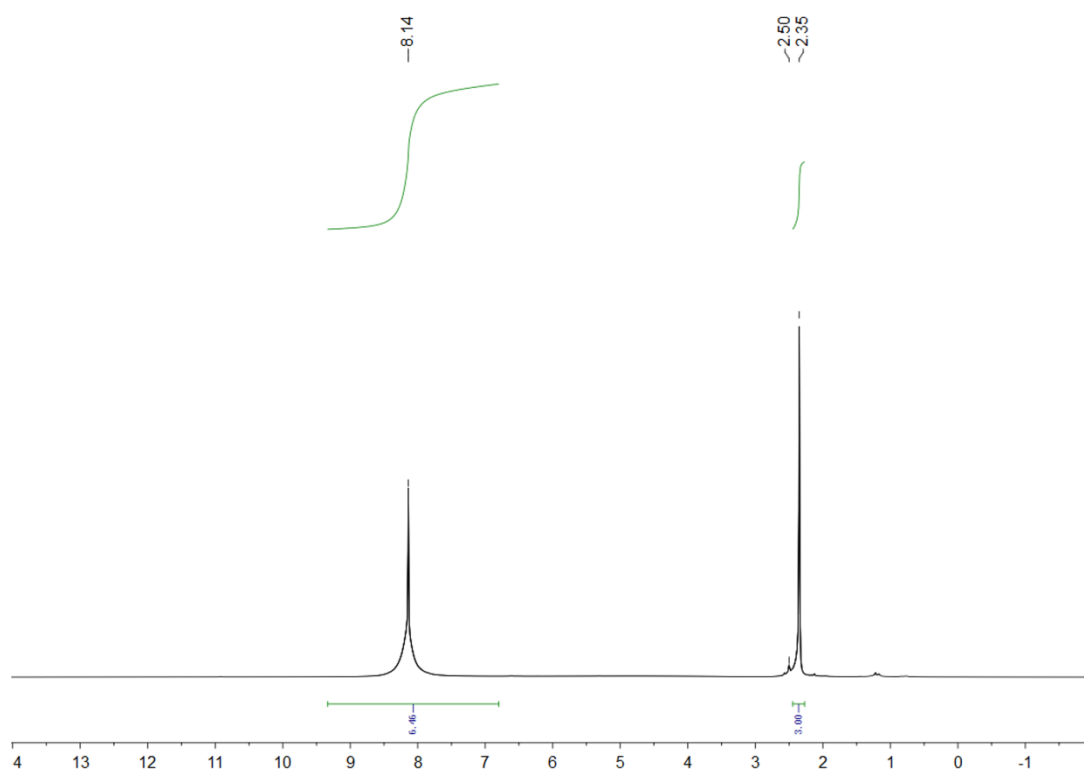

**Figure S7**  $^1\text{H}$  NMR spectra (300 MHz) of **2** in  $[\text{D}_6]\text{DMSO}$  at 25 °C

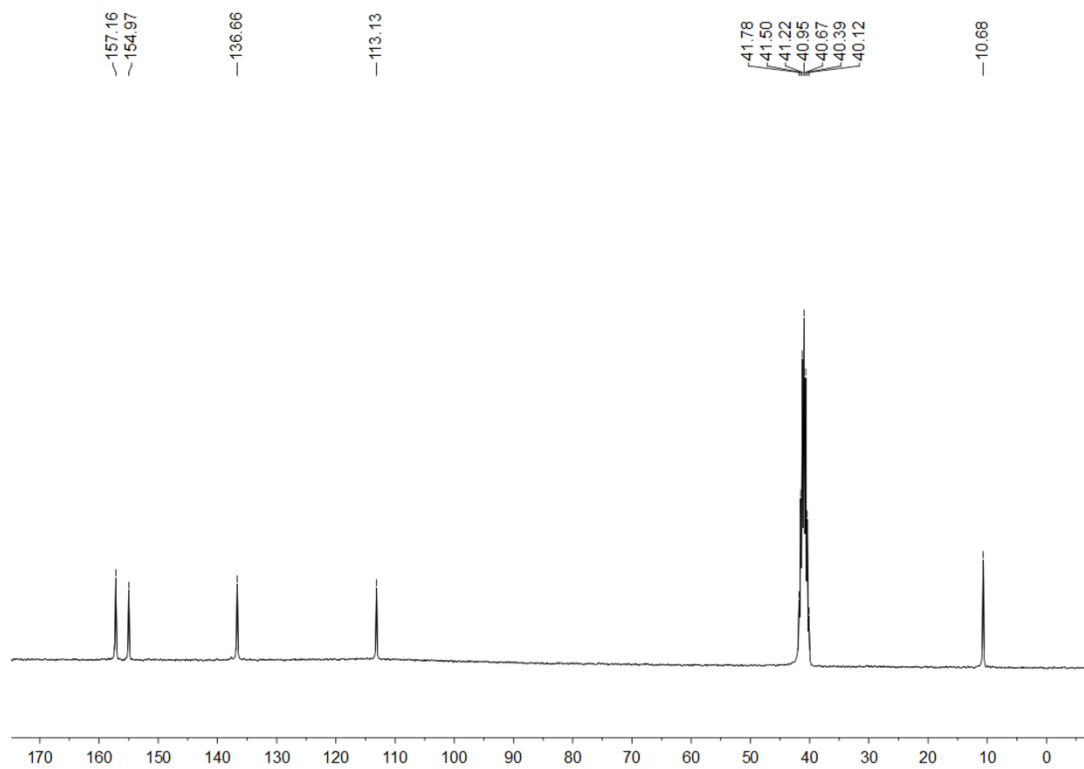

**Figure S8**  $^{13}\text{C}$  NMR spectra (75 MHz) of **2** in  $[\text{D}_6]\text{DMSO}$  at 25 °C

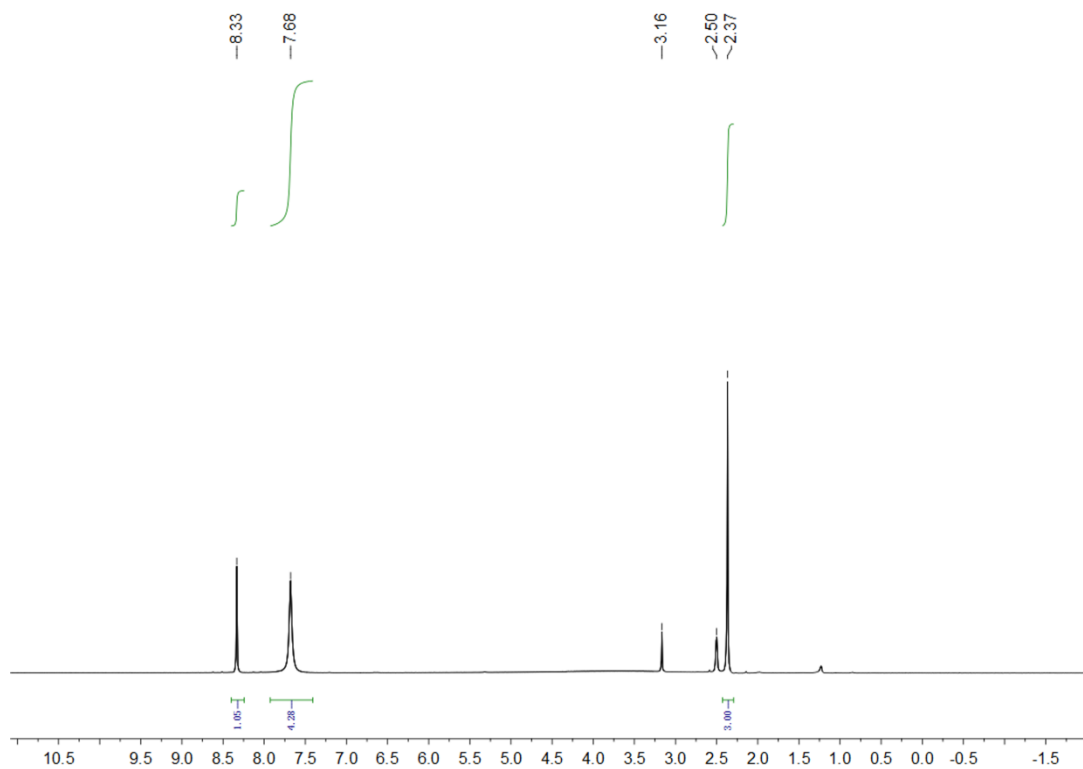

**Figure S9**  $^1\text{H}$  NMR spectra (300 MHz) of **3** in  $[\text{D}_6]\text{DMSO}$  at 25 °C

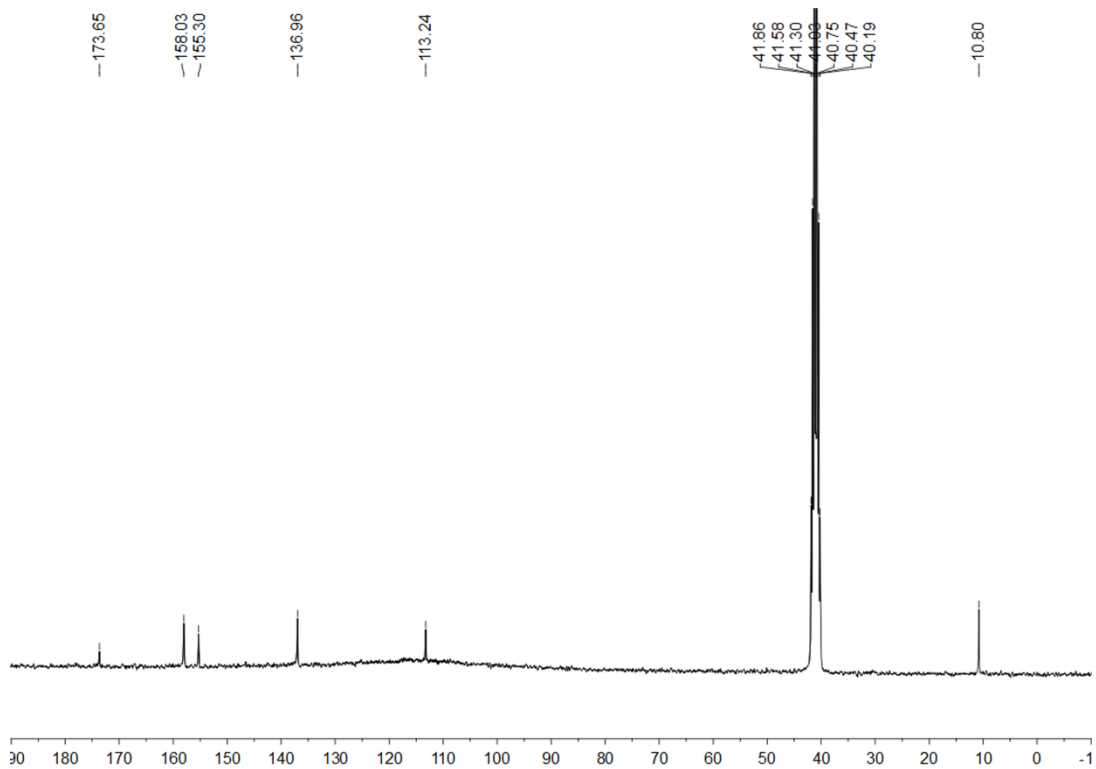

**Figure S10**  $^{13}\text{C}$  NMR spectra (75 MHz) of **3** in  $[\text{D}_6]\text{DMSO}$  at 25 °C

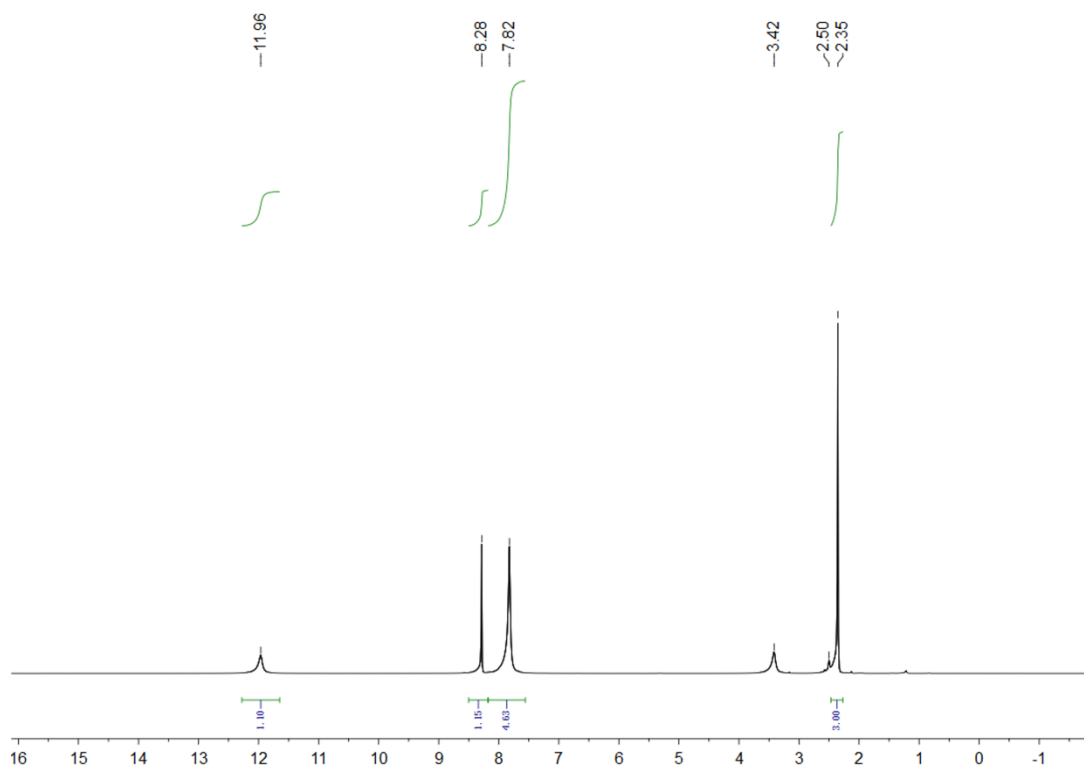

**Figure S11**  $^1\text{H}$  NMR spectra (300 MHz) of **4** in  $[\text{D}_6]\text{DMSO}$  at 25 °C

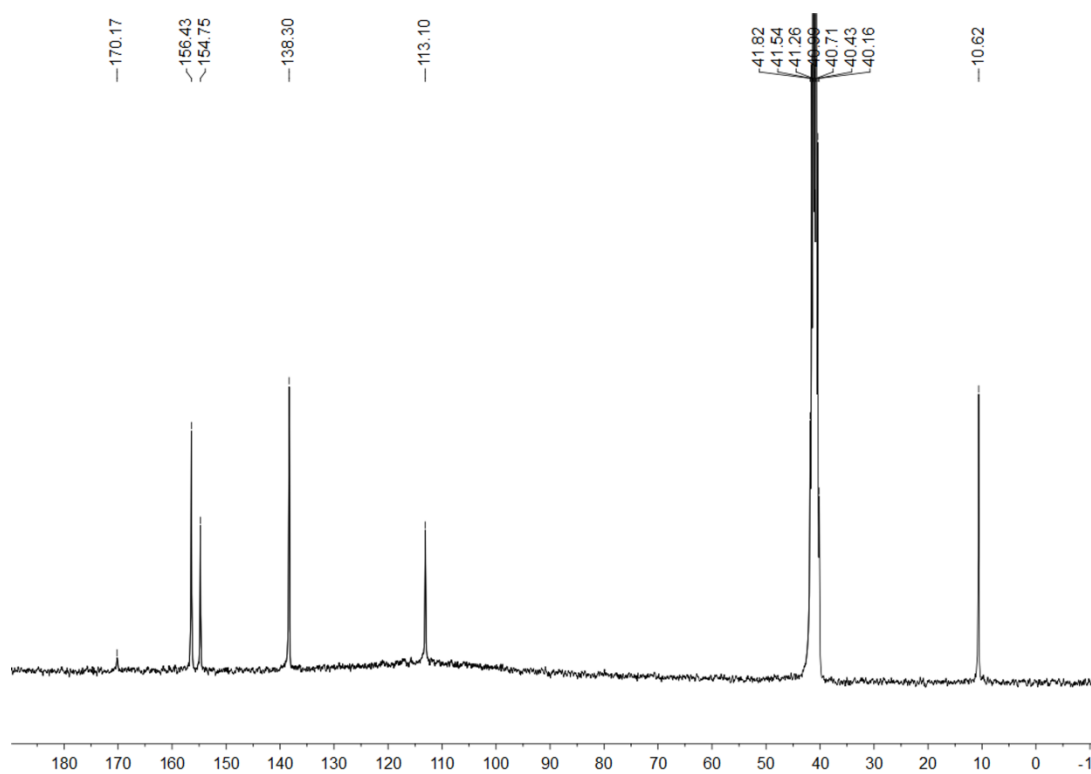

**Figure S12**  $^{13}\text{C}$  NMR spectra (75 MHz) of **4** in  $[\text{D}_6]\text{DMSO}$  at 25 °C



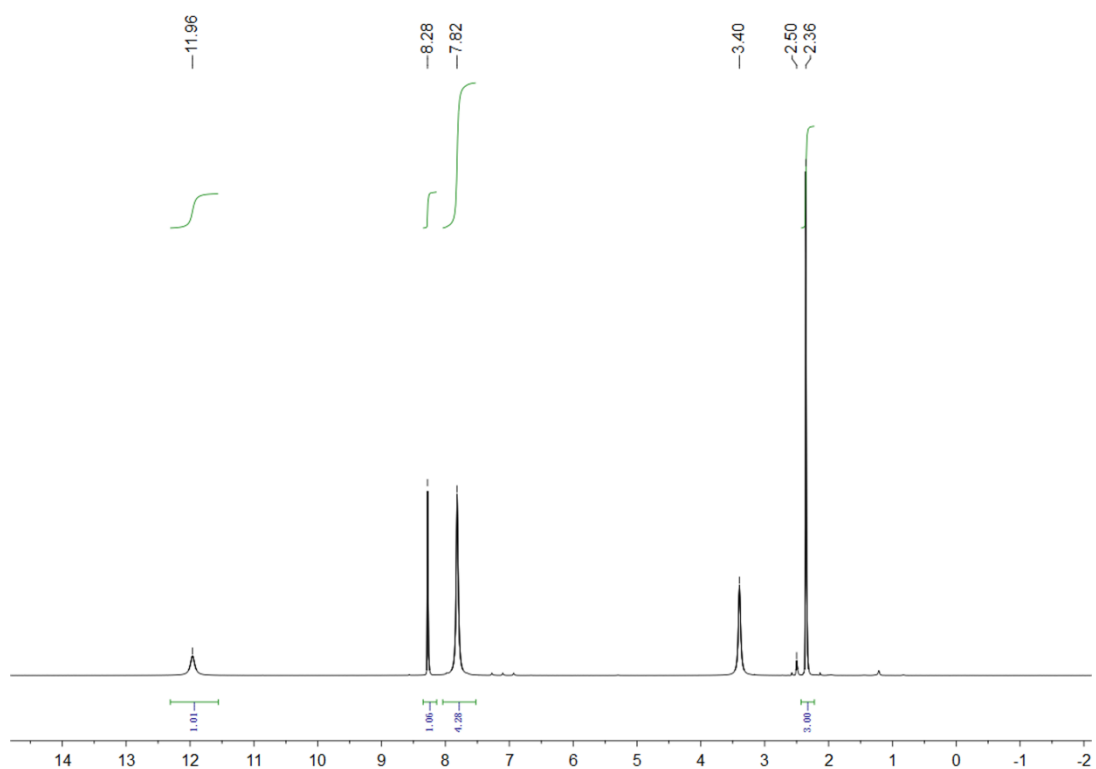

Figure S13  $^1\text{H}$  NMR spectra (300 MHz) of **5** in  $[\text{D}_6]\text{DMSO}$  at 25  $^\circ\text{C}$

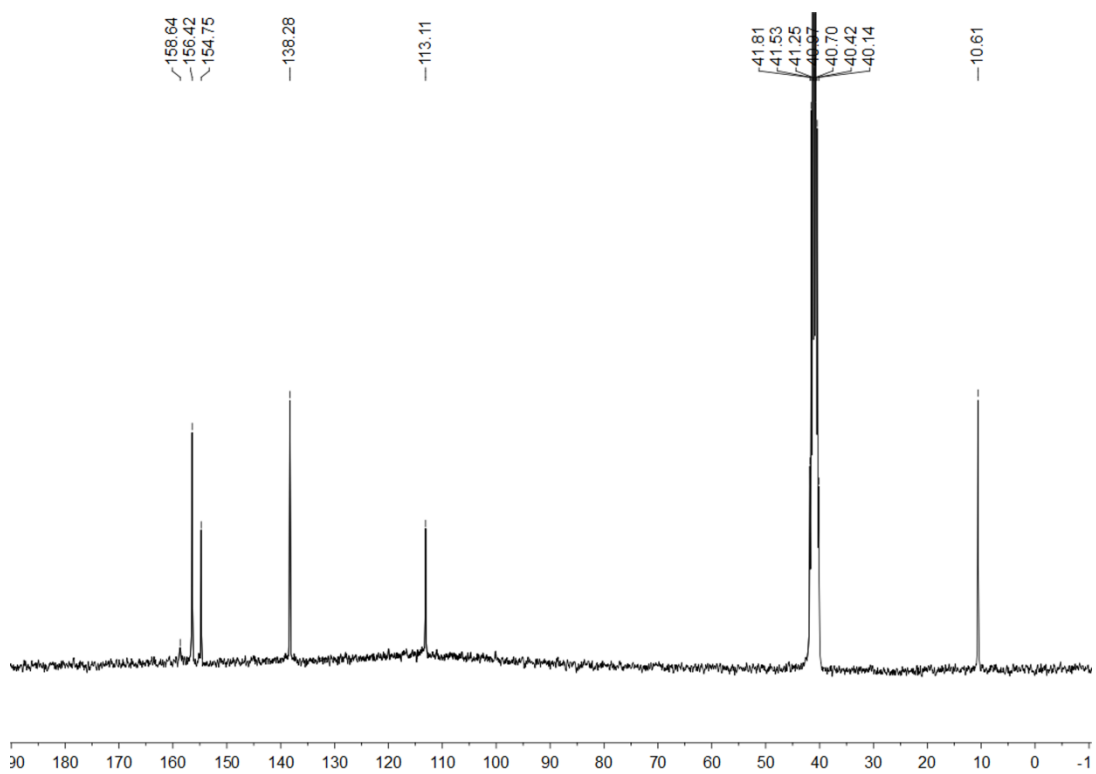

Figure S14  $^{13}\text{C}$  NMR spectra (75 MHz) of **5** in  $[\text{D}_6]\text{DMSO}$  at 25  $^\circ\text{C}$

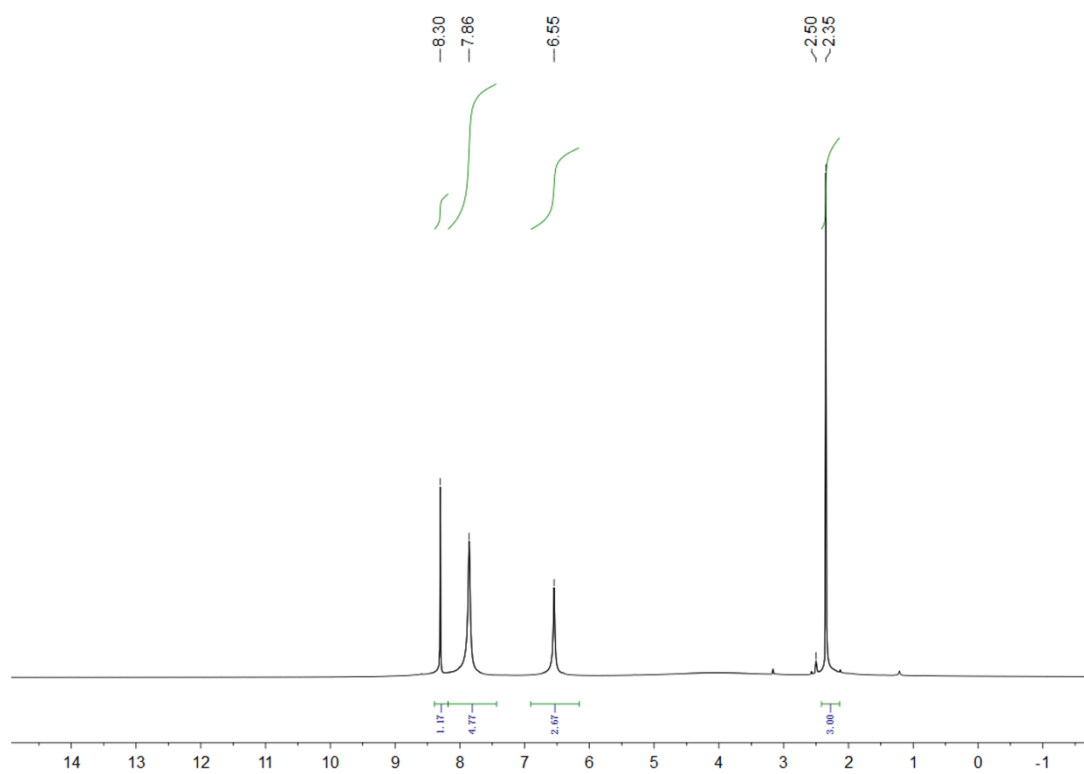

Figure S15  $^1\text{H}$  NMR spectra (300 MHz) of **6** in  $[\text{D}_6]\text{DMSO}$  at 25 °C

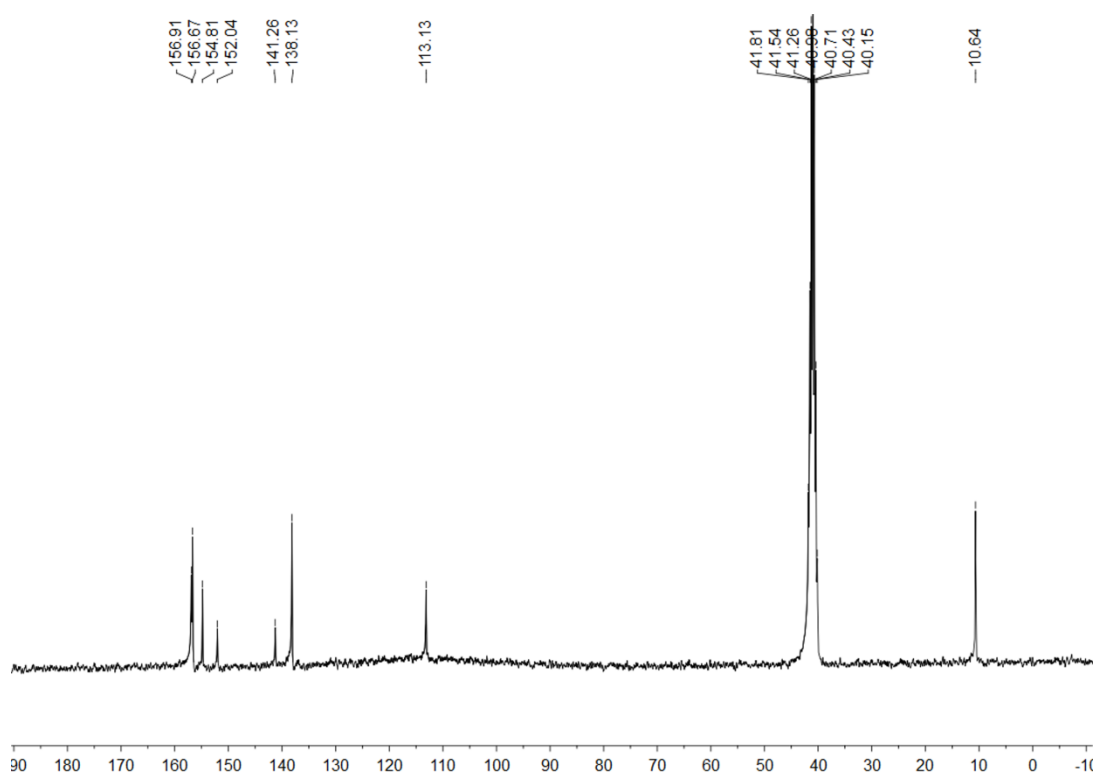

Figure S16  $^{13}\text{C}$  NMR spectra (75 MHz) of **6** in  $[\text{D}_6]\text{DMSO}$  at 25 °C

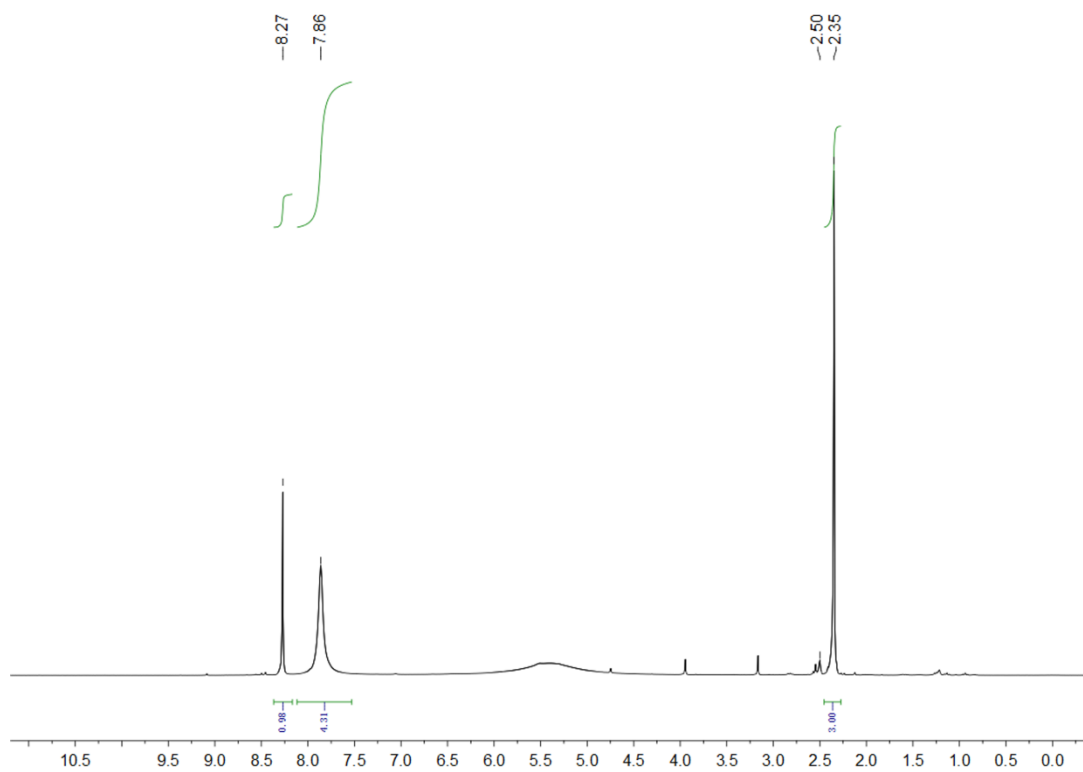

Figure S17  $^1\text{H}$  NMR spectra (300 MHz) of **7** in  $[\text{D}_6]\text{DMSO}$  at 25  $^\circ\text{C}$

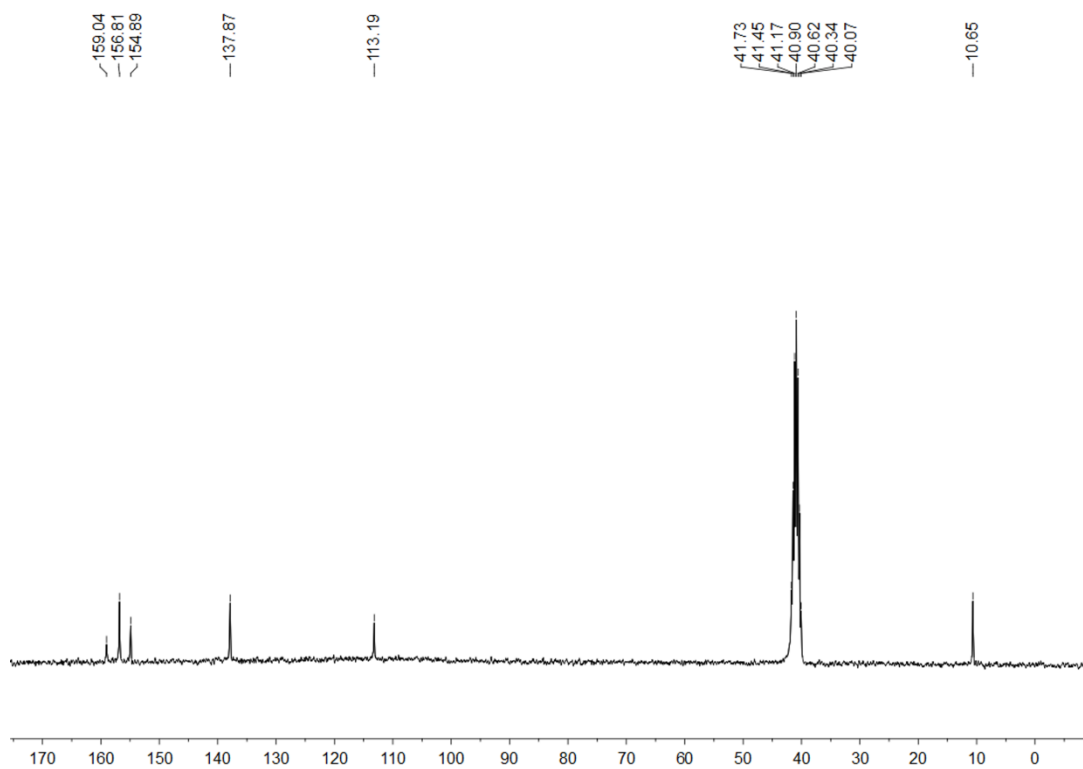

Figure S18  $^{13}\text{C}$  NMR spectra (75 MHz) of **7** in  $[\text{D}_6]\text{DMSO}$  at 25  $^\circ\text{C}$

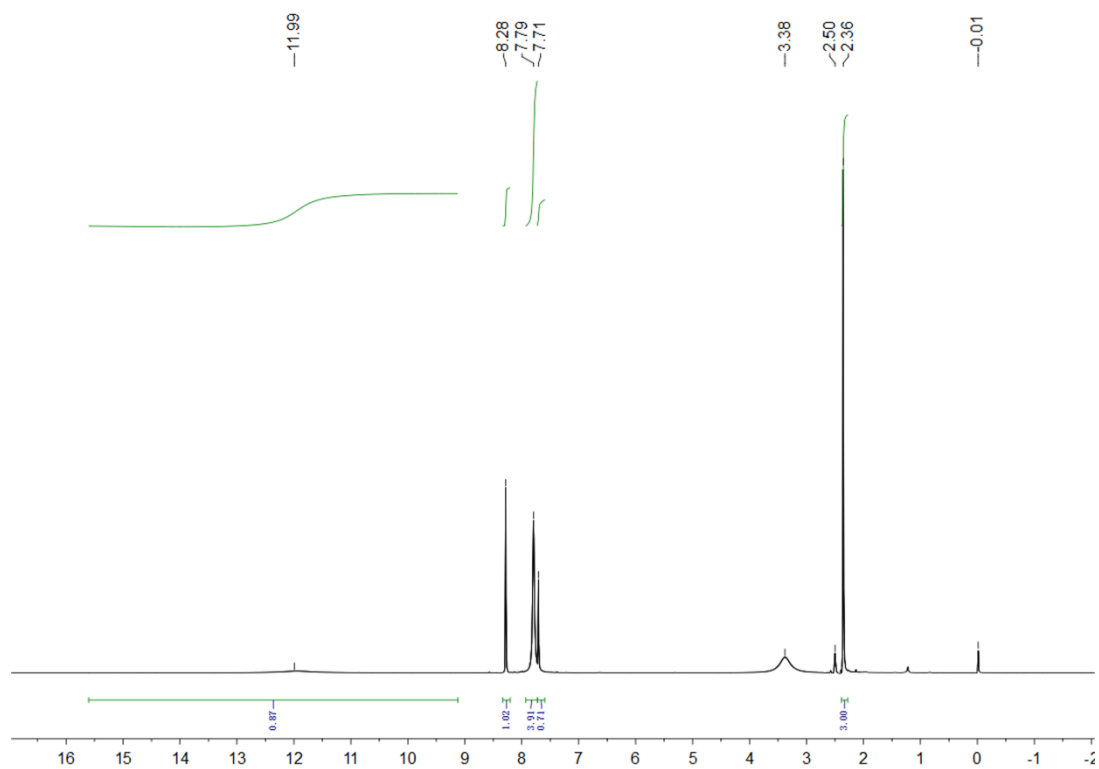

Figure S19  $^1\text{H}$  NMR spectra (300 MHz) of **8** in  $[\text{D}_6]\text{DMSO}$  at 25 °C

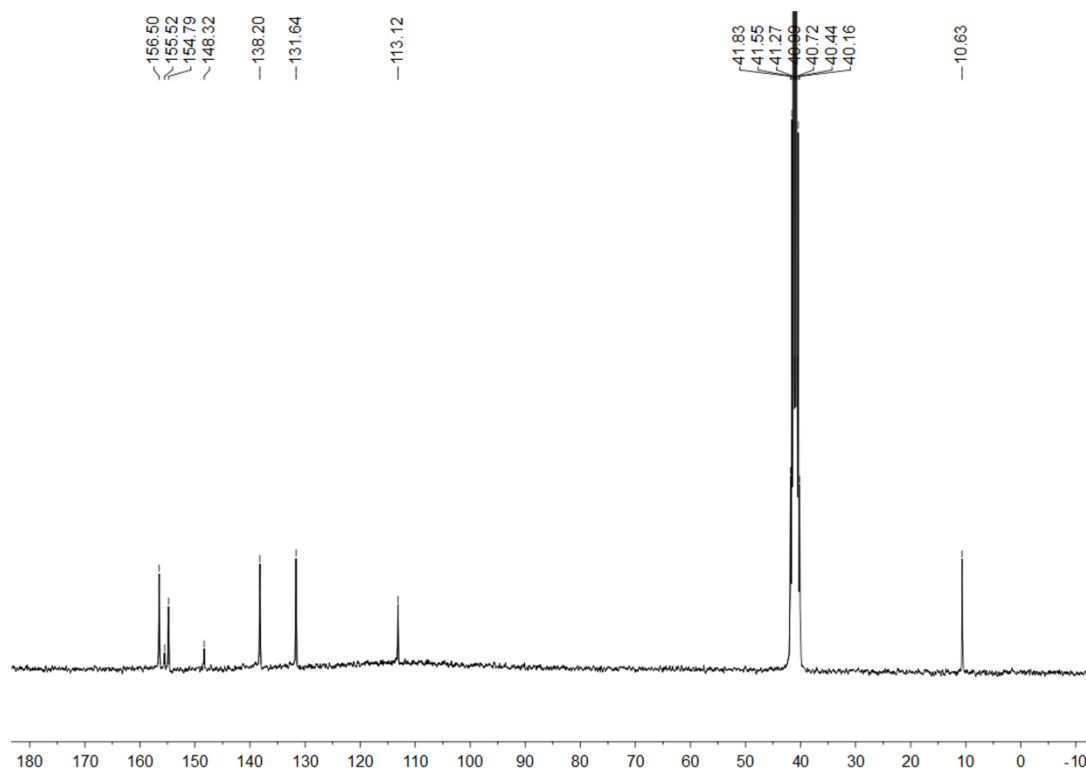

Figure S20  $^{13}\text{C}$  NMR spectra (75 MHz) of **8** in  $[\text{D}_6]\text{DMSO}$  at 25 °C

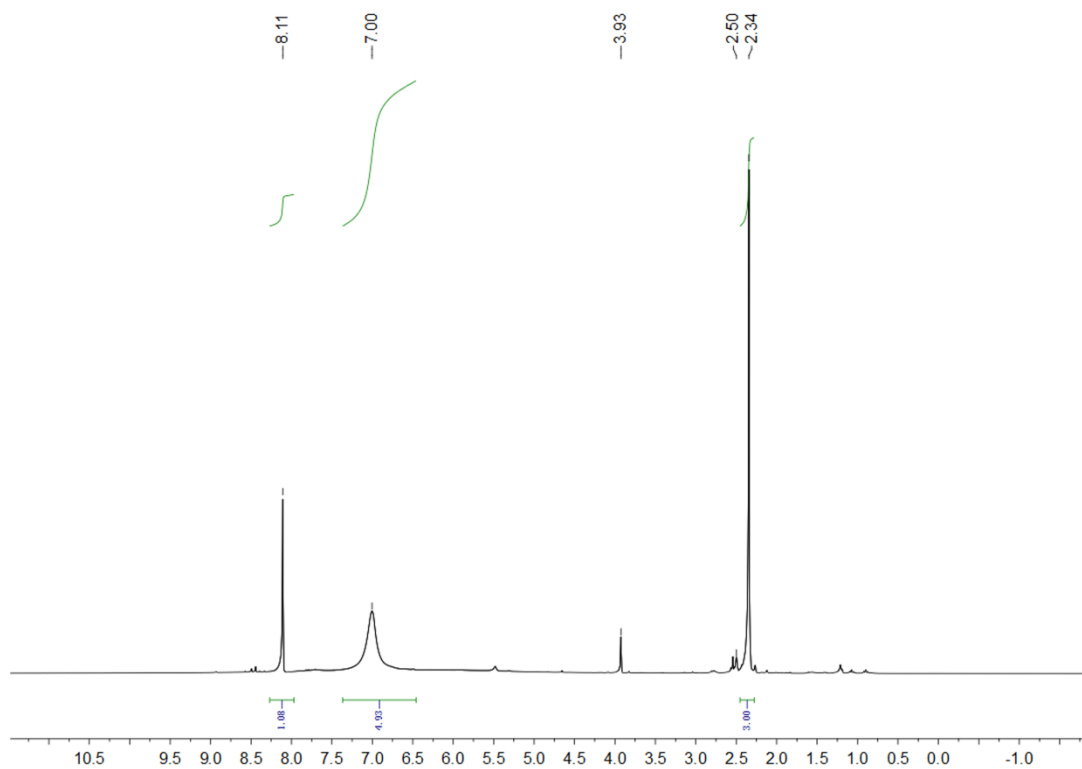

Figure S21  $^1\text{H}$  NMR spectra (300 MHz) of **9** in  $[\text{D}_6]\text{DMSO}$  at 25  $^\circ\text{C}$

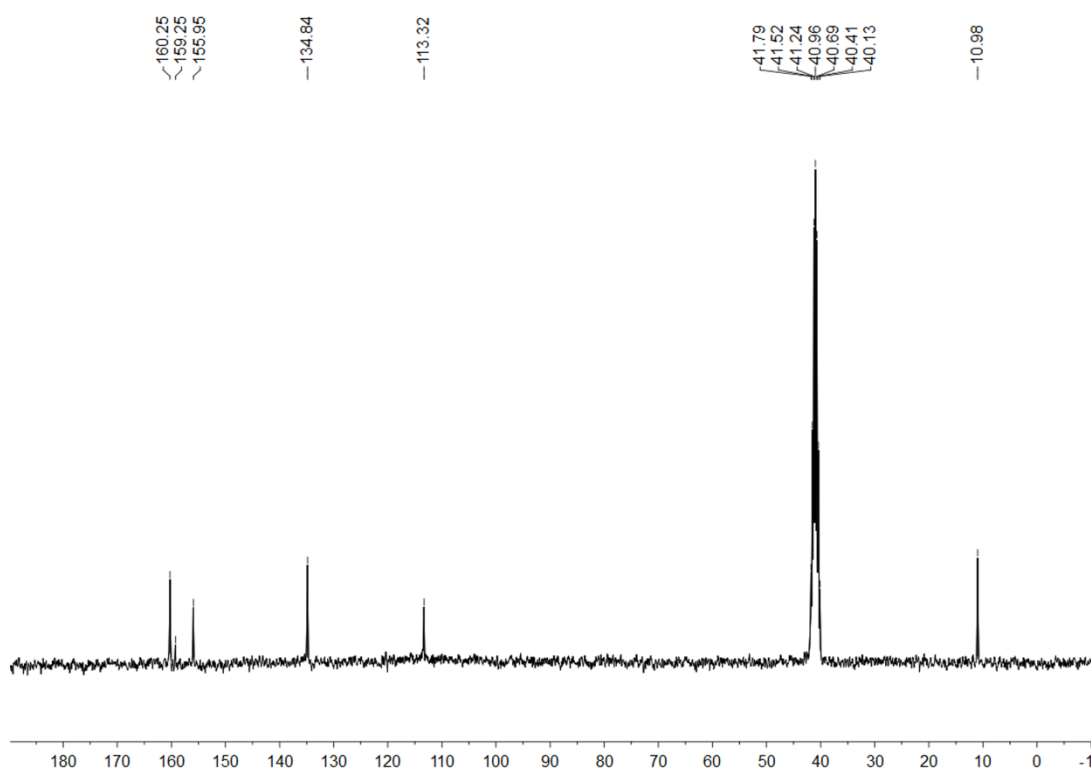

Figure S22  $^{13}\text{C}$  NMR spectra (75 MHz) of **9** in  $[\text{D}_6]\text{DMSO}$  at 25  $^\circ\text{C}$

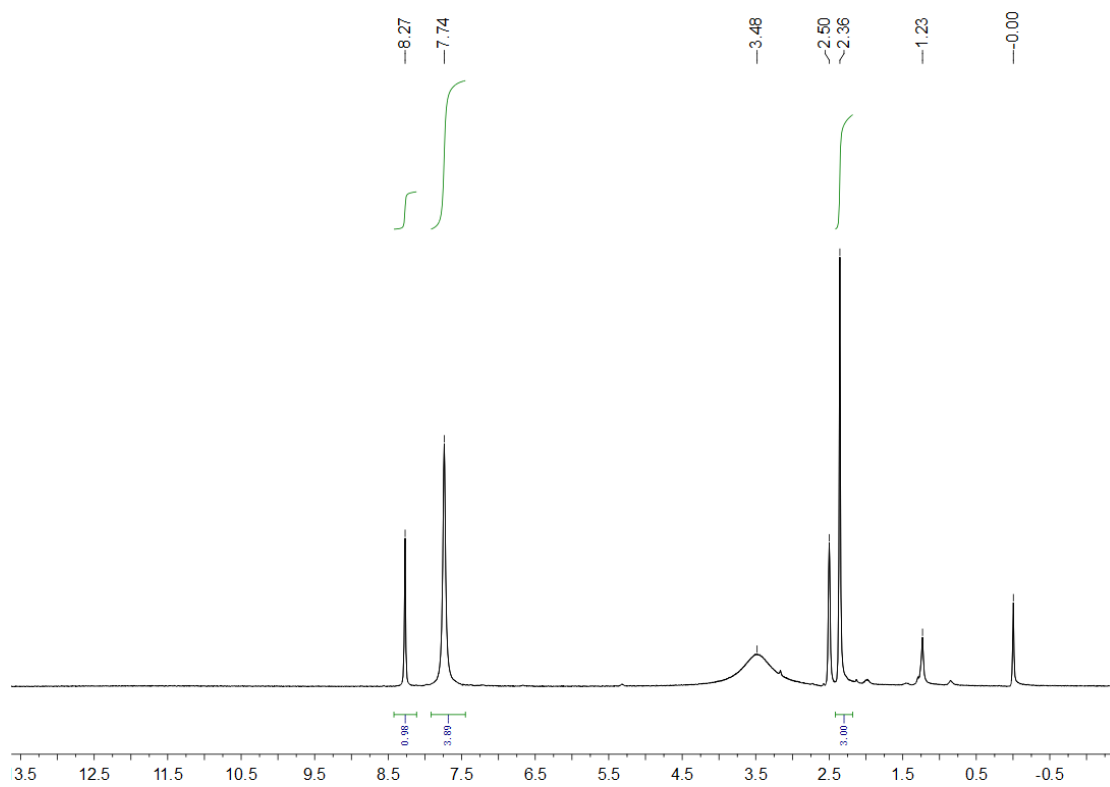

Figure S23  $^1\text{H}$  NMR spectra (300 MHz) of **10** in  $[\text{D}_6]\text{DMSO}$  at 25 °C

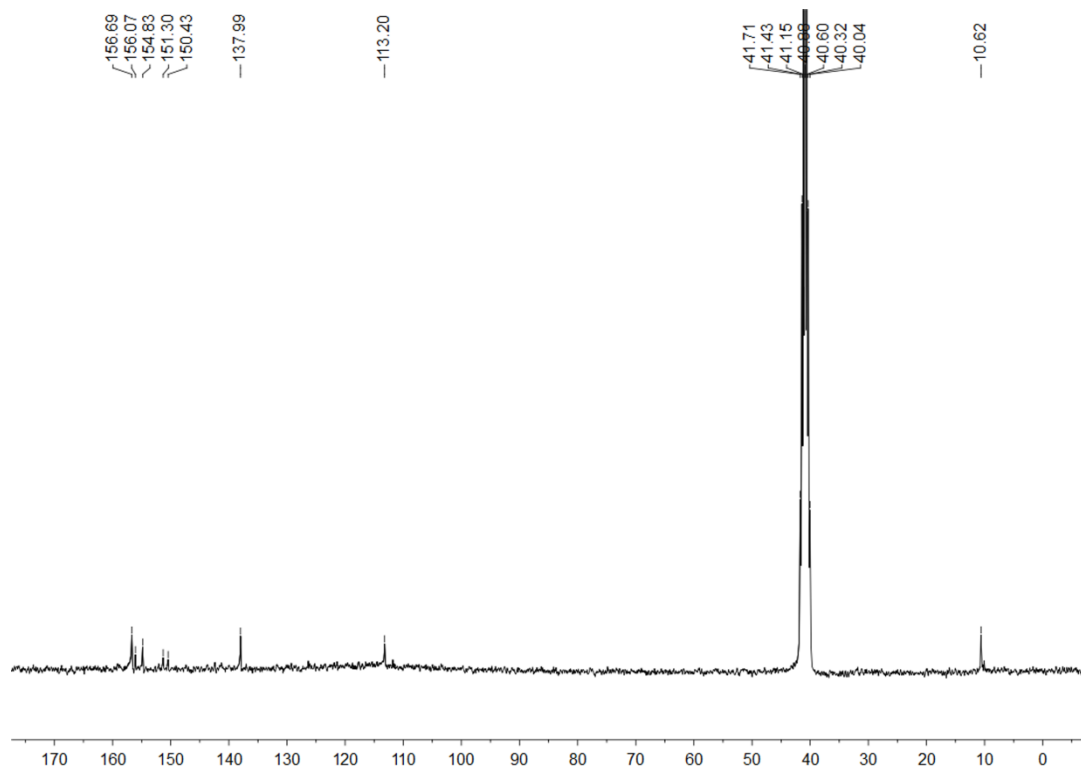

Figure S24  $^{13}\text{C}$  NMR spectra (75 MHz) of **10** in  $[\text{D}_6]\text{DMSO}$  at 25 °C

## 5. DSC curves of compounds 3-10

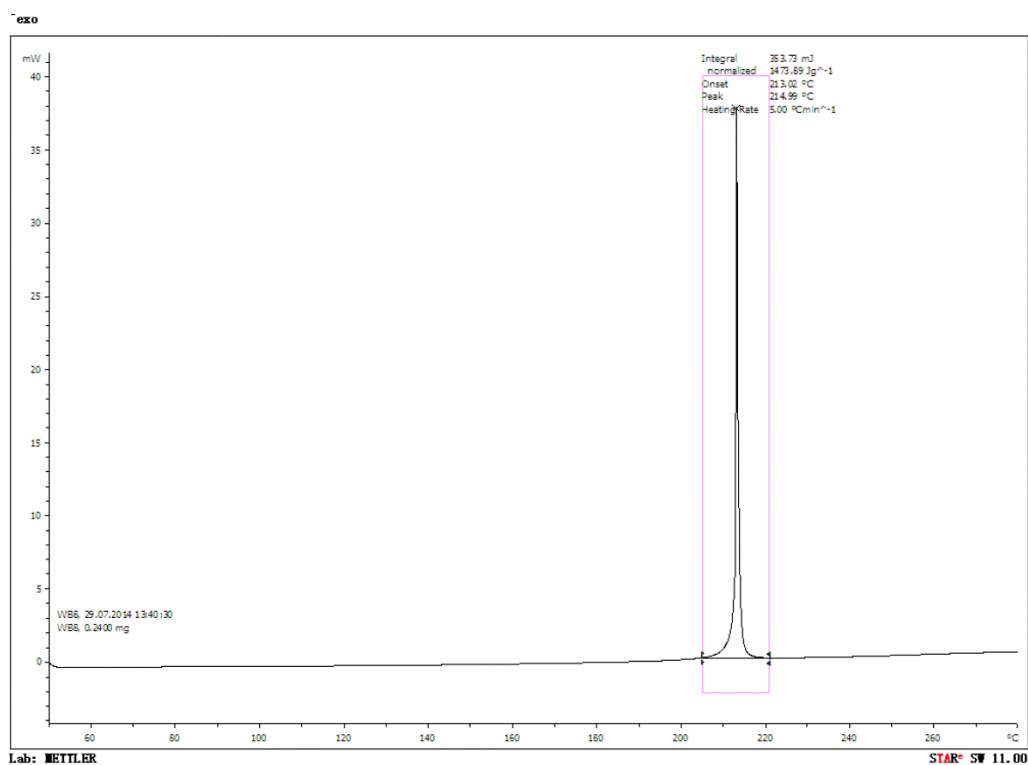

Figure S25 DSC curve of compound 3

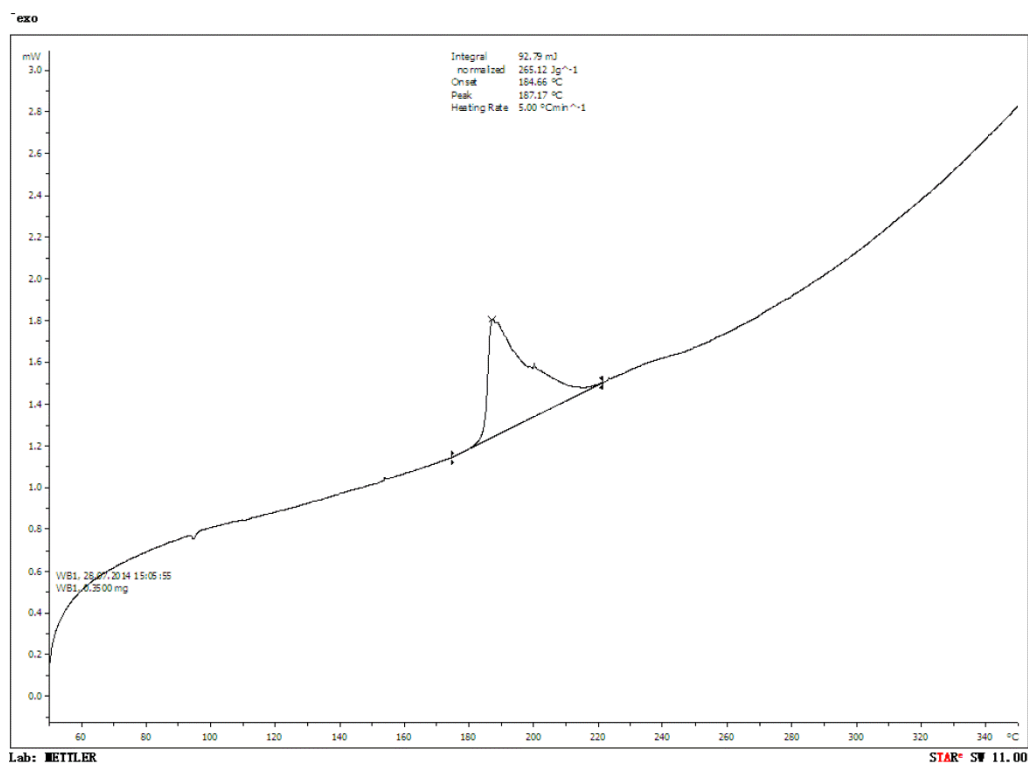

Figure S26 DSC curve of compound 4

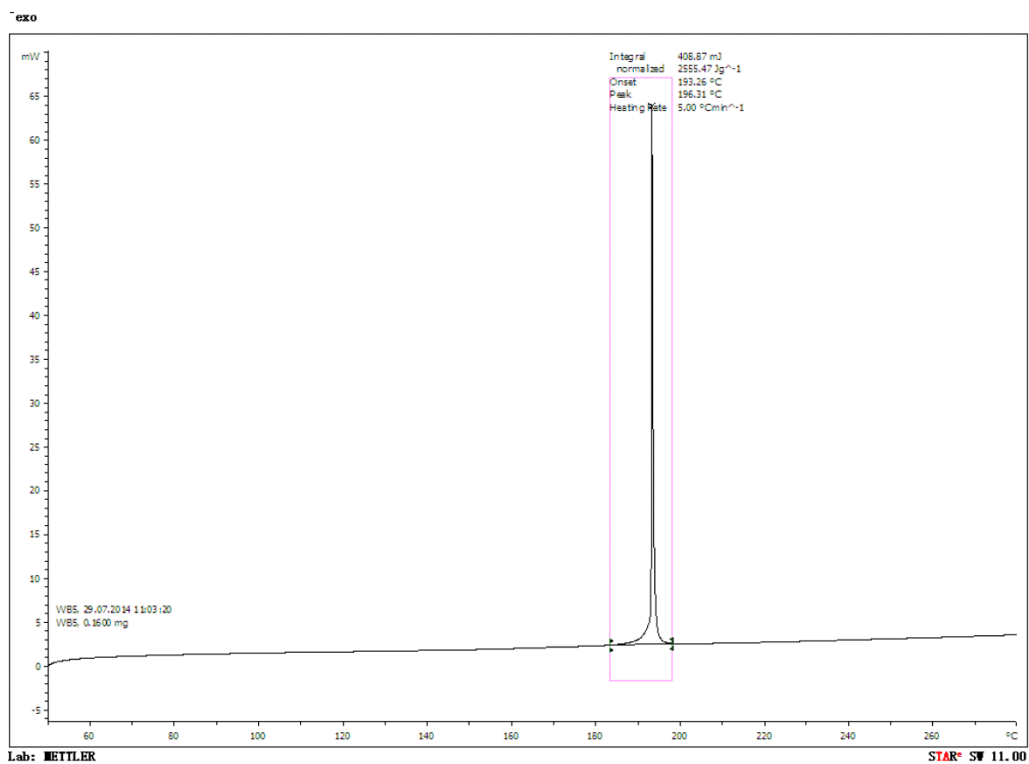

Figure S27 DSC curve of compound 5

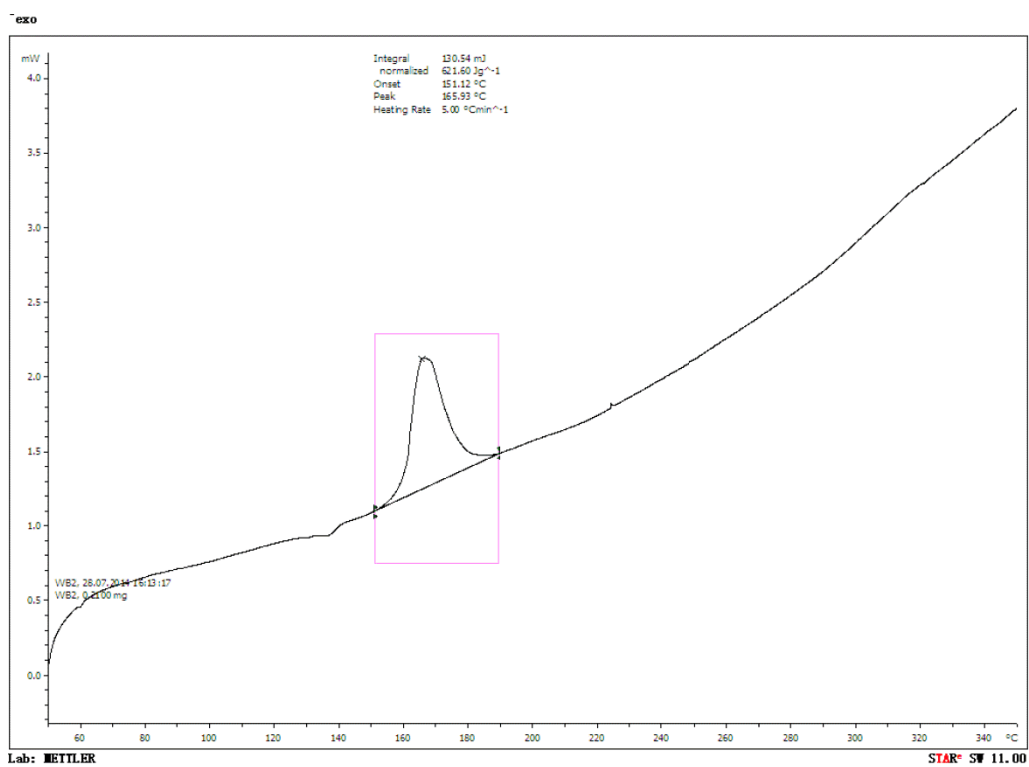

Figure S28 DSC curve of compound 6



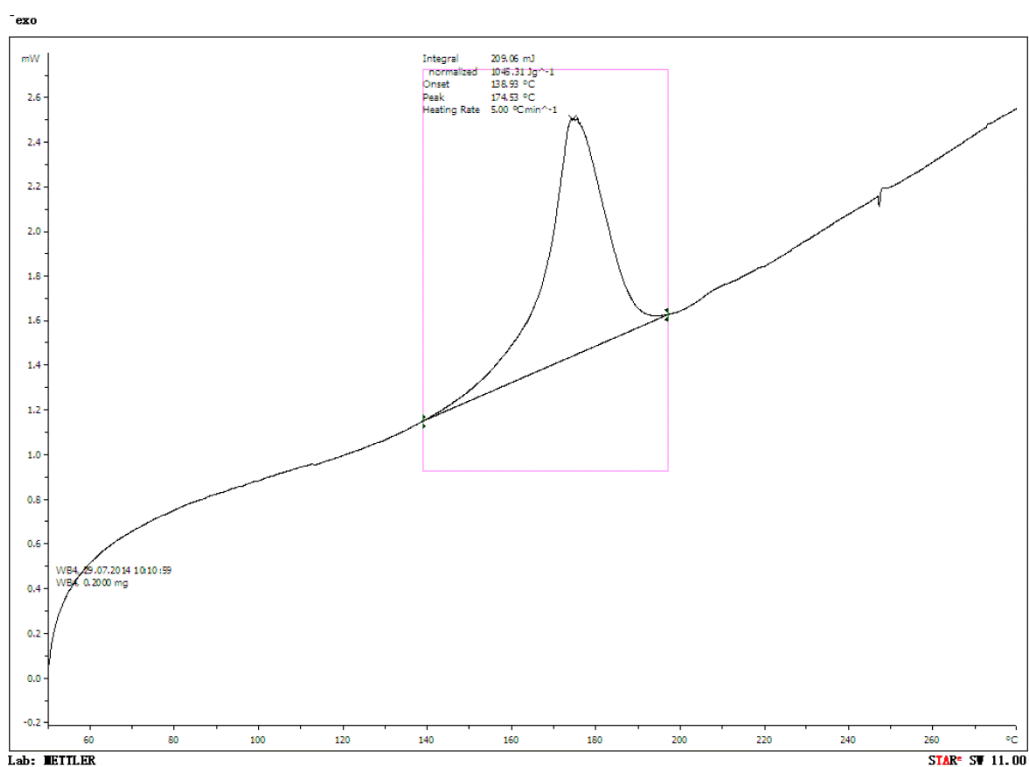

Figure S29 DSC curve of compound 7

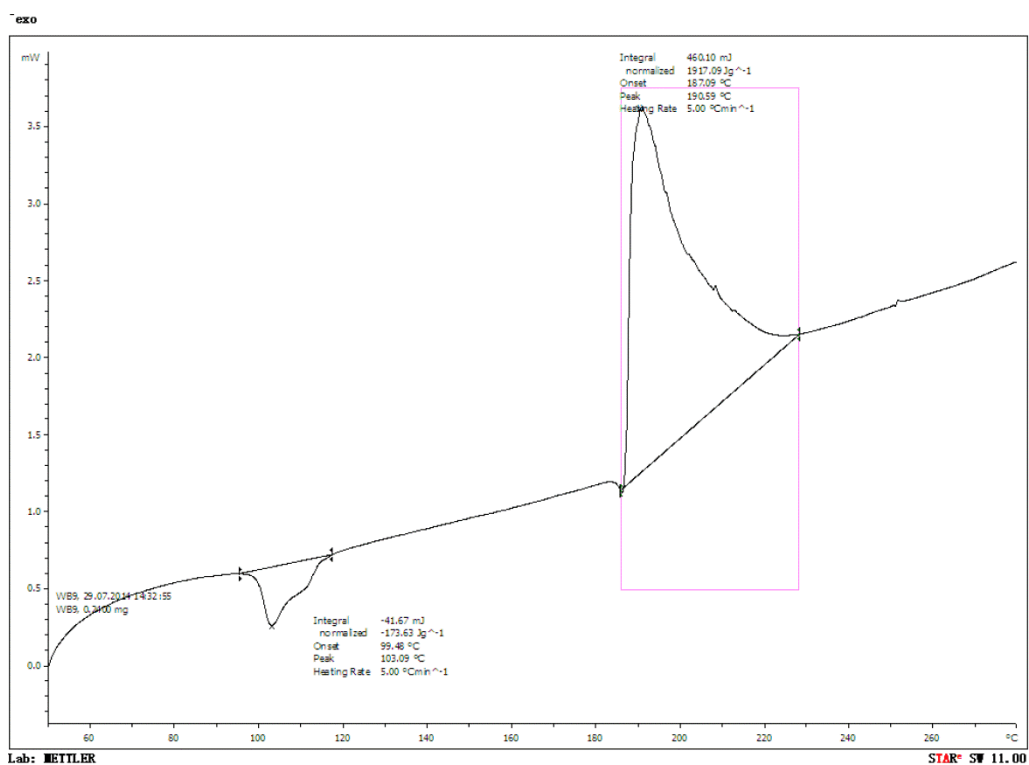

Figure S30 DSC curve of compound 8

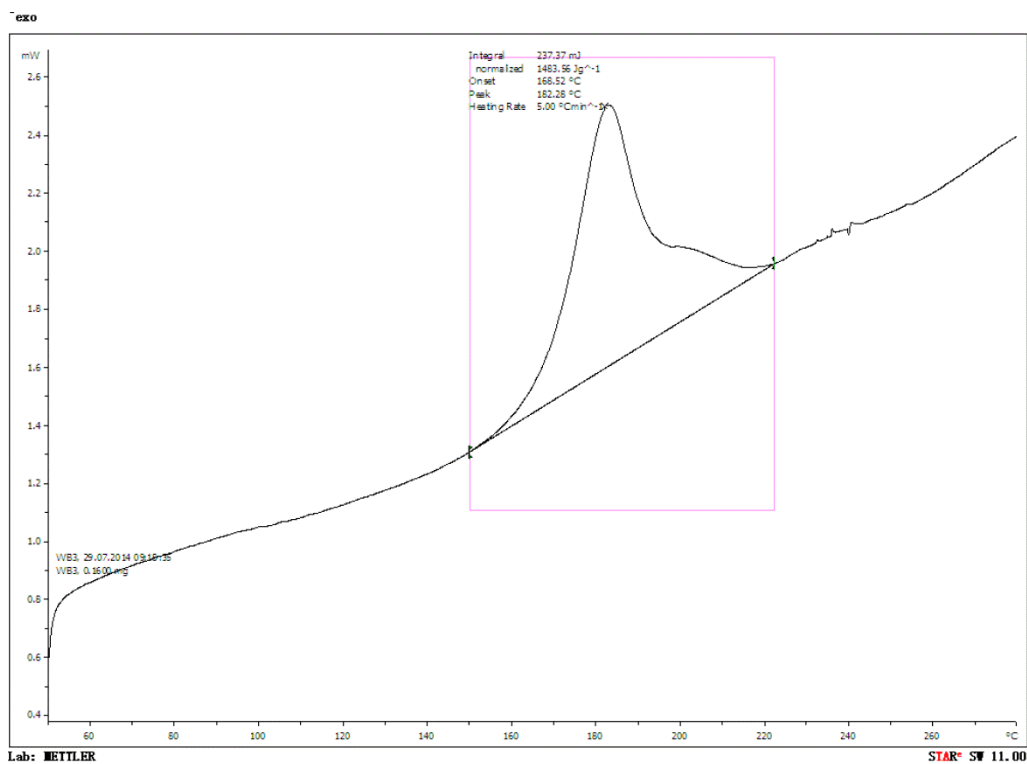

Figure S31 DSC curve of compound 9

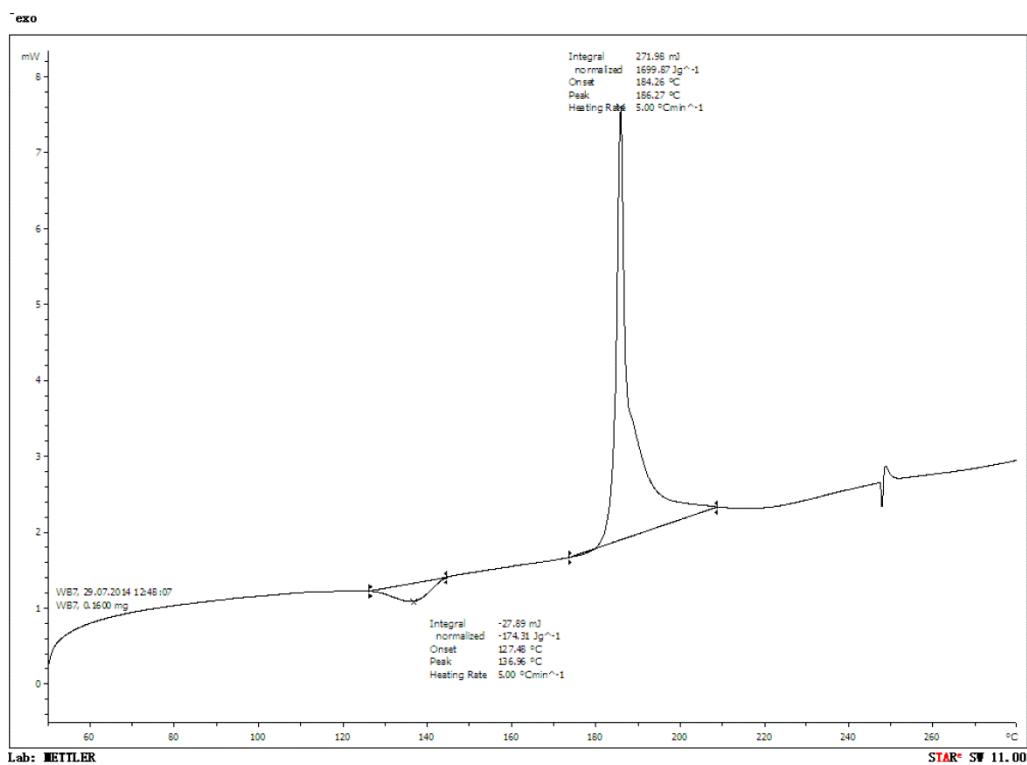

Figure S32 DSC curve of compound 10
